# Supplementary material
Source: HighWire-hosted journal article supplement (http://www.qdcxjkg.com/highwire/filestream/113832/field_highwire_adjunct_files/0/ERJ-00338-2012_supplement.pdf)
Supplement: ERJ-00338-2012_supplement.pdf [file ERJ-00338-2012_supplement.pdf]

## **Genome-wide association analysis reveals 12q13.3 q14.1 as new risk locus for sarcoidosis**

Sylvia Hofmann\*, Annegret Fischer\*, Michael Nothnagel, Gunnar Jacobs, Benjamin Schmid, Michael Wittig, Andre Franke, Karoline I. Gaede, Manfred Schürmann, Martin Petrek, Frantisek Mrazek, Stefan Pabst, Martin Grohé, Johan Grunewald, Marcus Ronninger, Anders Eklund, Philip Rosenstiel, Kerstin Höhne, Gernot Zissel, Joachim Müller-Quernheim, Stefan Schreiber

\* Both authors contributed equally to this work.

### **Online Data Supplement**

## Contents

|                                                                                       |    |
|---------------------------------------------------------------------------------------|----|
| 1. Methods                                                                            | 3  |
| Patient and control subjects                                                          | 3  |
| Genotyping and quality control                                                        | 4  |
| SNP selection and statistical analysis                                                | 5  |
| mRNA isolation from BAL cells and RT-PCR (BAL panel I)                                | 5  |
| 2. Results                                                                            | 7  |
| Known risk loci in screening panel A (GWAS)                                           | 7  |
| Cell composition in BAL panel II                                                      | 7  |
| 3. Figures                                                                            | 8  |
| Figure E1: Study design                                                               | 8  |
| Figure E2: Density plot of “outlier detection“-analysis                               | 9  |
| Figure E3: Signal intensity plots in the GWAS for the 99 SNPs selected for validation | 10 |
| Figure E4: Quantile-quantile (Q-Q) plot of the association test statistic             | 11 |
| Figure E5: Disease association of SNPs in the chromosome 6p22.33–p21.32 region        | 12 |
| Figure E6: Regional plot of the fine-mapped region around the lead SNP                | 13 |
| Figure E7: Electropherogram for the two novel SNPs detected by Sanger sequencing      | 14 |
| Figure E8: Expression of the eight candidate genes                                    | 15 |
| Figure E9: Quantitative analysis of OS9 expression rs1050045                          | 17 |
| Figure E10: Percentage of alveolar macrophages in BALs                                | 18 |
| Figure E11: CD4+/CD8+ T lymphocytes in the BAL.                                       | 19 |
| 4. Tables                                                                             | 20 |
| Table E1: SNPs used in the backward model selection in a logistic regression model.   | 20 |
| Table E2: Primer used for the detection of variants in the OS9 regions                | 21 |
| Table E3: RT-PCR primer used for tissue-specific expression and BAL panel I           | 22 |
| Table E4: Primer used for quantification of OS9 mRNA expression (BAL panel II)        | 22 |
| Table E5: Results of the GWAS and of the validation stage                             | 23 |
| Table E6: Results for the 53 SNPs genotyped to fine-map 12q13.3-q14.1 in panel C      | 27 |
| Table E7: Results of the haplotype analysis                                           | 29 |
| Table E8: Prediction of SNP function                                                  | 29 |
| 5. References                                                                         | 31 |

## 1. Methods

### Patient and control subjects

German patients of the screening panel A (n = 640) and of the validation panel B (n = 1,664) were actively contacted through the German Sarcoidosis Patients Organization, specialized hospitals, practitioners, and by calls for study participation that were published via health insurance institutions. In the latter case, histological confirmation of the diagnosis was necessary for inclusion of individuals. All patients completed a questionnaire on the course of disease. Patients' physicians were contacted to provide clinical radiology and laboratory data required to confirm the diagnosis of sarcoidosis. Patients were classified as having either chronic or acute sarcoidosis or Löfgren's syndrome. All the recruitments have been done in a retrospective setting and the clinical presentation and course of disease was known according to standard definitions as previously described [1, 2]. All centers followed that recruitment strategy later described in detail in our publication on sarcoidosis phenotypes for scientific purposes [3]. Only patients who could be unequivocally categorized to acute or chronic were recruited to those subphenotypes.

Panel A included 191 "acute" and 401 "chronic" patients (mean age 50.8 years,  $\pm 11.7$ , 48% male), while panel B comprised 563 individuals with "acute" and 947 individuals with "chronic" sarcoidosis (mean age 60.8 years,  $\pm 11.7$ , 38% male); both panels comprised a total of 123 patients with Löfgren's syndrome. The remaining sarcoidosis patients could not be classified according to the course of the disease, but showed other phenotypes, e.g. solely cutaneous sarcoidosis, or were detected by radiography for other reasons and had no specific complaints.

Healthy German control individuals with a median age of 57.7 years ( $\pm 15.1$  years) in panel A (n=1,256; 56% male, 44% female) and 52.5 years ( $\pm 15.8$ ) in panel B (n= 2,932; 45% male, 55% female) were obtained from the population-derived pool of controls individuals in the PopGen project, identified on the basis of the local population registry. Detailed information on recruitment is given in the respective publication from the PopGen biobank [4]. For both cases and controls, the study was restricted to probands of German ancestry, i. e. only individuals whose parents were born in Germany. Panel A almost completely overlaps with the panel that was used in the previously published sarcoidosis 5.0 screen and to some extent with the panel used in the SNP-scan in 2005 respectively [2, 5].

Swedish patients of panel C-III were referred to the outpatient clinic at the Pulmonary Division at the Karolinska University Hospital, Solna, Sweden, where they were investigated

by clinicians and radiologists with long experience of interstitial pulmonary disease. All patients were diagnosed with sarcoidosis through typical clinical and radiological manifestations, findings at bronchoscopy with bronchoalveolar lavage (BAL) including an elevated CD4/CD8 BAL cell ratio, and positive biopsies, using the criteria as outlined by the World Association of Sarcoidosis and other Granulomatous disorders (WASOG) [6]. Swedish controls were contributed by the Swedish Epidemiological Investigation of Rheumatoid Arthritis (EIRA) study [7].

Fine-mapping was carried out in 1,829 sarcoidosis patients, comprising all patients from panel B and parts of panel A, including 597 “acute” and 1,055 chronically affected patients, and in 1,465 controls from panel B. Informed written consent was obtained from all study participants and all collection protocols were approved by the institutional review committees of the participating centers.

### **Genotyping and quality control**

Panel A was genotyped by an Affymetrix service facility for a total of 934,968 SNPs using the Genome-Wide Human SNP Array 6.0 (Affymetrix, Santa Clara, CA, USA) and genotypes were generated using the BRLMM-p algorithm. Samples with either more than 10% missing genotypes ( $n = 0$ ), or showing cryptic relatedness to other study participants ( $n = 23$ ), or showing excess of genetic dissimilarity to the other subjects as evaluated by the identical-by-state (IBS) analysis and a multiple scaling analysis using the European HapMap reference data (CEU; CEPH Utah residents with ancestry from northern and western Europe; phase II, build 36;  $n = 3$ ) [8] were removed from the data set. The plot for outlier detection and the quantile-quantile plot (data supplement Figures E2 and E4) were created using R v2.8.0 [9]. All gender assignments could be verified by reference to the proportion of heterozygous SNPs on the X chromosome using the sex check option implemented in PLINK. The following procedures were conducted to assure marker quality using PLINK v.1.06 [10]: SNPs that had a low genotyping rate ( $< 95\%$  in cases or controls), that were monomorphic or rare (minor allele frequency  $< 2\%$  in cases or controls), or that deviated from Hardy-Weinberg equilibrium (HWE) in the control sample ( $p_{\text{HWE}} \leq 0.01$ ) were excluded ( $n = 257,349$ ; 27.5%). Tests for HWE were performed using an exact test [11]. The number of excluded SNPs might be mainly due to genotyping errors and is in line with that of other published Affymetrix-based GWAS [12-15]. In addition, cluster plots for all SNPs for validation in panel B, were visually inspected for correct genotype assignment. Genotyping of panel B was carried out in-house using ligation-based SNPlex™ technology (Applied Biosystems, Foster City, CA, USA) as previously described [16, 17]. Genotype assignments were visually inspected using

the Genemapper 4.0 software (Applied Biosystems). TaqMan<sup>®</sup> SNP Genotyping (Applied Biosystems) was used to genotype marker rs1050045 in panel B for technical validation. All process data were written to and administered by a previously described database-driven laboratory information management system (LIMS) [18]. Quality control procedures for panels C, D and E were identical, except no evaluation of the IBS status was performed in these panels.

### **SNP selection and statistical analysis**

Statistical analysis of genotype data was carried out using PLINK v.1.06 [10]. In the entire experiment, single-marker case-control analyses were performed using  $\chi^2$  tests with one degree of freedom (multiplicative model). Logistic regression was carried out also in R v2.10.1, using the glm function from the stats package. Backward model selection using Akaike's Information Criterion (AIC) [19] was applied using the step function in R from the same package. Linkage disequilibrium (LD) plots were generated using GOLD [20]. Haplotype analysis was conducted by performing a score test assuming additive effect using the haplo.stats R package [21].

The SNPs for validation were selected upon:

- LD ( $r^2 > 0.5$ ) with at least one neighboring SNP (distance  $< 250$  kb) with a p value  $< 1.0 \times 10^{-3}$  in the case-control analysis using the “clumping” option in PLINK.
- Fulfillment of the quality criteria mentioned above, including correct genotype assignment regarding the index as well as the neighboring SNP(s).
- Selection of the 99 top-ranking SNPs by uncorrected p value in the case-control analysis ( $p \leq 9.05 \times 10^{-4}$ ) based on power estimation (power  $\geq 61$  %) using PS power and sample size calculation v2.1.30 [22].
- SNPs for fine-mapping were selected from the European HapMap reference (CEU) via pairwise tagging using Haploview [23] by using the following criteria: minor allele frequency  $> 1\%$ , tagging threshold  $r^2 > 0.8$ ,  $p_{HWE} > 0.01$  and less than two Mendelian errors.

### **mRNA isolation from BAL cells and quantitative real-time (qRT)-PCR (BAL panel I and II)**

Bronchoalveolar lavage (BAL) cell samples were taken from 4 patients with active, non-acute sarcoidosis without any medical treatment at the time of BAL and 4 unmedicated, unaffected individuals without infection and non-malignant at time of lavage. The diagnosis of non-acute

sarcoidosis was established retrospectively in accordance with previously defined criteria [6] including detection of noncaseating granuloma by transbronchial biopsies. All sarcoidosis patients showed clinical signs for an active disease. All BAL cell samples included in this study were matched by their portion of alveolar macrophages. Thus, alterations merely associated with different cell composition could be excluded. All patients and matched controls gave their informed consent to the study. BAL was performed as previously described [24]. The cell suspensions used in this study contained >92% alveolar macrophages. The viability of the cells was 95%.

Total RNA was isolated from snap-frozen BAL cell using a commercial kit (RNeasy, Qiagen, Hilden, Germany). For detection of mRNA levels of *OS9*, *AGAP2*, *TSPAN31*, *CDK4*, *MARCH9*, *CYP27B1*, *METTL1* und *FAM119B*, cDNA was synthesized from 500 ng of total RNA using the Advantage RT-for-PCR kit (Clontech Laboratories, Palo Alto, CA, USA) according to the manufacturer's protocol. SYBR Green PCR Master Mix (Applied Biosystems) and the 7900HT Fast Real Time PCR system was used for qRT-PCR using the same target-specific primers as described above. Transcript amounts were normalized to *GAPDH* mRNA levels. Relative expression levels of the target genes were checked for significant differences between sarcoidosis patients and unaffected individuals (n = 4 each) using non-parametric Mann-Whitney U test using the Graphpad software (Graphpad, Inc.; La Jolla, CA).

Total RNA from BAL cells of panel II was isolated using Trizol (Invitrogen, Carlsbad, CA) and reverse transcribed using StrataScript reverse transcriptase (Stratagene, La Jolla, CA) with oligo-dT primers (Biomers, Ulm, Germany) for 1 h at 50°C. Specific primers for human OS9 and GAPDH were designed using Primer3 software [25], Amplify1.2 software (University of Wisconsin, USA; <http://engels.genetics.wisc.edu/amplify>) using LocusLink and GenBank databases (National Center for Biotechnology Information; <http://www.ncbi.nlm.nih.gov/LocusLink/index.html>). Primer sequences used for panel II are depicted in table E7. All primers were intron-spanning and synthesized by biomers (Biomers.net, Ulm, Germany). Real time PCR was performed with the iQ SYBR Green SuperMix, iCycler thermocycler, and iCycler iQ 3.0 software (Bio-Rad Laboratories GmbH, Germany) according to the manufacturer's protocol. To control for specificity of the amplification products, a melting curve analysis was performed. No amplification of nonspecific products was observed in any of the reactions. A threshold cycle value (Ct) was calculated and used to compute the relative level of specific mRNA by the following formula: "relative expression =  $2^{(Ct_{GAPDH}-Ct_{CCL18})}$  x 10,000" for each cDNA sample.

## 2. Results

### Known risk loci in screening panel A (GWAS)

The known risk genes *BTNL2* and *ANXA11* (represented by markers rs2076530 and rs1953600, respectively; [2, 5]) were associated with acute as well as with chronic sarcoidosis in panel A (acute:  $p = 1.39 \times 10^{-4}$  and  $p = 6.07 \times 10^{-5}$ ; chronic:  $p = 2.75 \times 10^{-11}$  and  $p = 9.55 \times 10^{-7}$ ) in the single-marker case-control analysis. The *Rab23* region (rs3957366), which was identified using the Affymetrix 100k Gene Chip, as well as the common susceptibility locus for sarcoidosis and Crohn's disease on chromosome *10p12.2* (rs1398024) yielded association results, which are consistent with those obtained in the previous studies ( $p = 1.36 \times 10^{-3}$  and  $p = 0.04$ , respectively; [26, 27]).

### Cell composition in BAL panel II

The BAL cell composition of *OS9*-positive patients disclosed a higher percentage of lymphocytes compared to controls ( $34 \pm 23\%$  versus  $9 \pm 4\%$ ,  $p < 2 \times 10^{-2}$ ), however, the lymphocyte percentage of *OS9*-negative patients was even higher ( $52 \pm 21\%$ ,  $p < 2 \times 10^{-3}$ ). Vice versa, the percentage of alveolar macrophages was highest in controls ( $88 \pm 7\%$ ), lower in *OS9*-positive patients ( $63 \pm 23\%$ ;  $p < 2 \times 10^{-2}$ ) and lowest in *OS9*-negative patients ( $44 \pm 22\%$ ;  $p < 2 \times 10^{-3}$ , Figure E9). Most interestingly, compared with controls the *OS9*-negative group disclosed a significantly increased percentage of HLA-DR-positive lymphocytes ( $5 \pm 3\%$  versus  $38 \pm 25\%$ ;  $p < 5 \times 10^{-2}$ , Figure E10) indicating an exaggerated T-cell activation in this group. No significant differences could be detected between the *OS9*-positive patient group ( $12 \pm 11\%$ ) and controls.

## Figures

**Figure E1: Study design.** The study followed a multi-stage design, which includes the analysis of the genome-wide SNP data in a screening phase (stage 1) and the validation of most promising candidates in an independent sample (stage 2). Replication in further independent populations confirmed rs1050045 at chromosome 12q13.3-q14.1 as a risk factor for sarcoidosis. Fine-mapping, mutation detection and expression studies point to *OS9* as the likely underlying risk gene. The method used for genotyping is given in italics, and the number of cases and controls is stated in brackets.

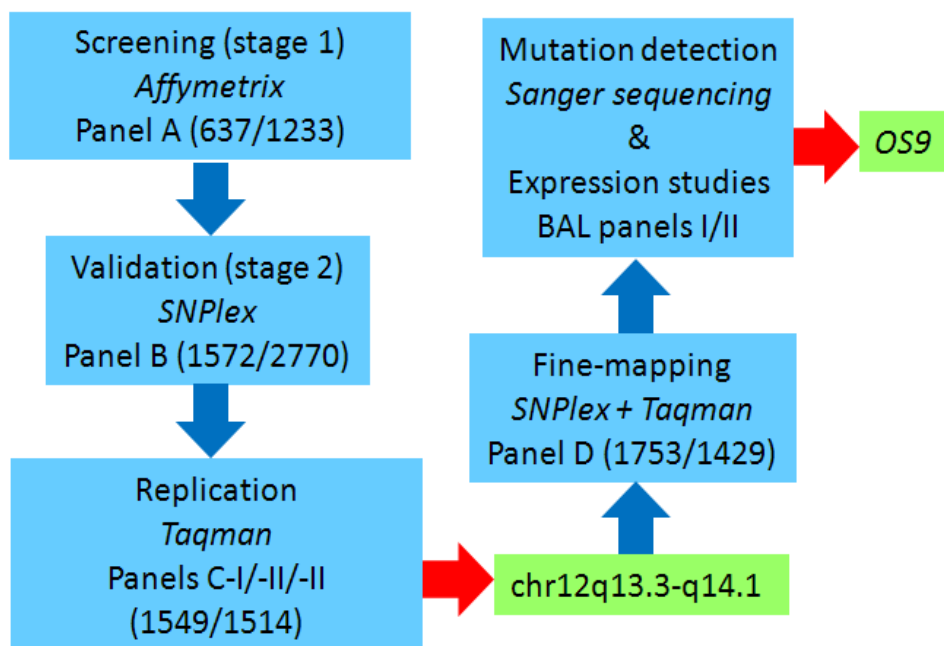



**Figure E2: Density plot of pairwise IBS values for screening panel A samples after removal of samples showing cryptic relatedness to other samples.** Identical by state (IBS) values were computed between all pairs of samples over all markers that met eligibility criteria on Hardy-Weinberg equilibrium and genotype call rate using PLINK v1.06. Sample outliers were identified by comparing the distribution of IBS values from each individual with the combined IBS distribution of the entire population. 23 individuals were excluded for cryptic relatedness ( $IBS > 0.8$ ) and three individuals were removed due to clear genetic dissimilarity to the majority of the study participants ( $IBS < 0.76$ ).

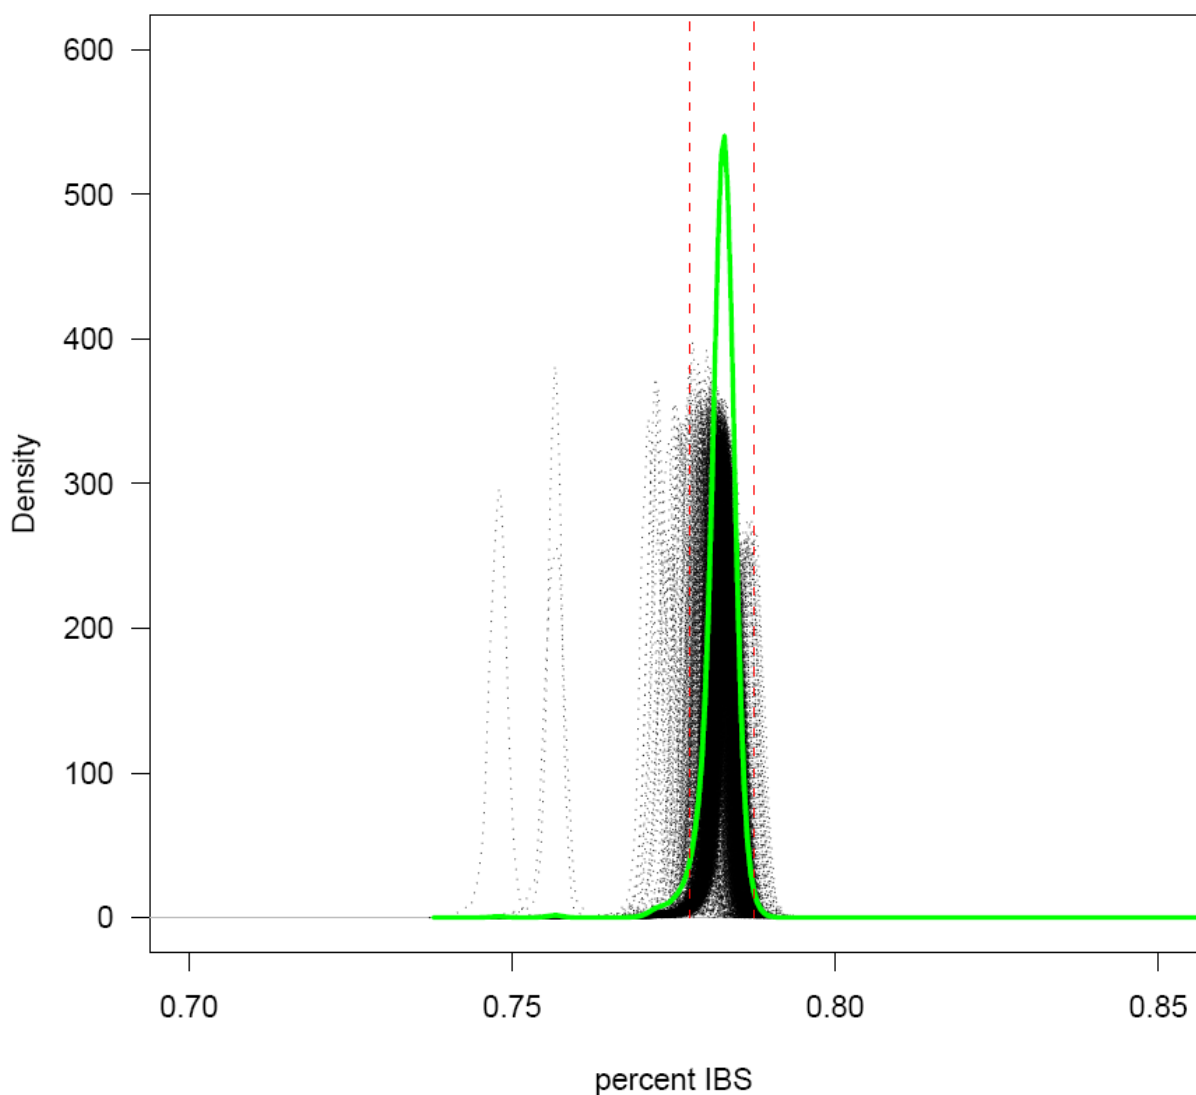

**Figure E3: Signal intensity plots in the GWAS for the 98 SNPs selected for validation.** Scatter plots of normalized summary probe intensities for the lead SNP rs1050045 (= SNP\_A-4304028). Each point represents one individual and is colored according to the genotype assignment by the calling algorithm (blue or red: homozygous for one of the two alleles; green: heterozygous; black circle: 'null' or missing call). Alleles are given according to the Affymetrix annotation table.

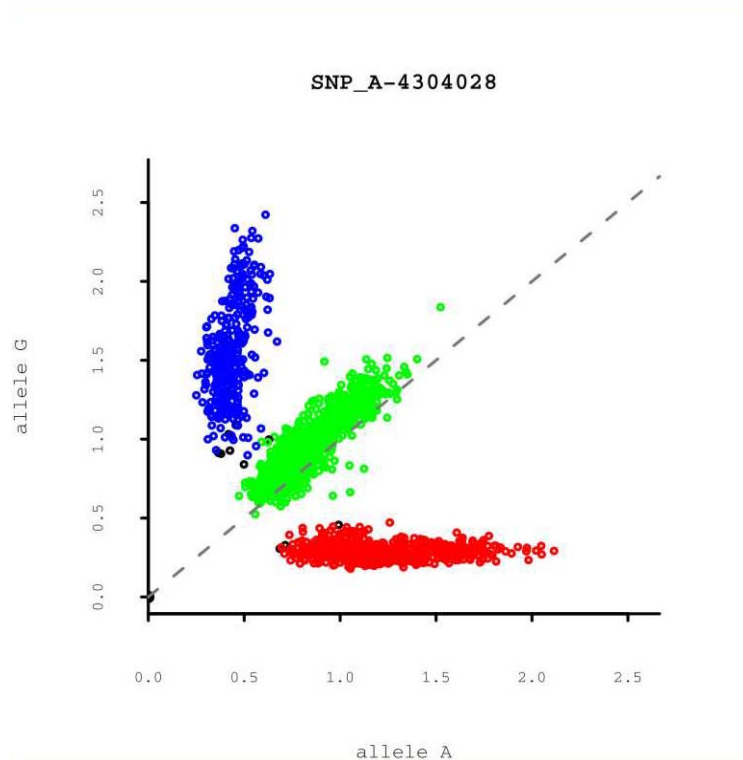

**Figure E4: Quantile-quantile (Q-Q) plot of the association test statistic in panel A.** The figure is based on all 677,619 SNPs that passed the quality control. Blue dots: whole marker set. Red dots: after exclusion of 2,480 SNPs located in the extended MHC region. The overdispersion of the association test statistic was estimated to be  $\lambda_{GC} = 1.15$ . The plot was created using the function `qq.chisq` of the R-package `snpMatrix` v1.0.33 (<http://www-gene.cimr.cam.ac.uk/clayton/software/>).

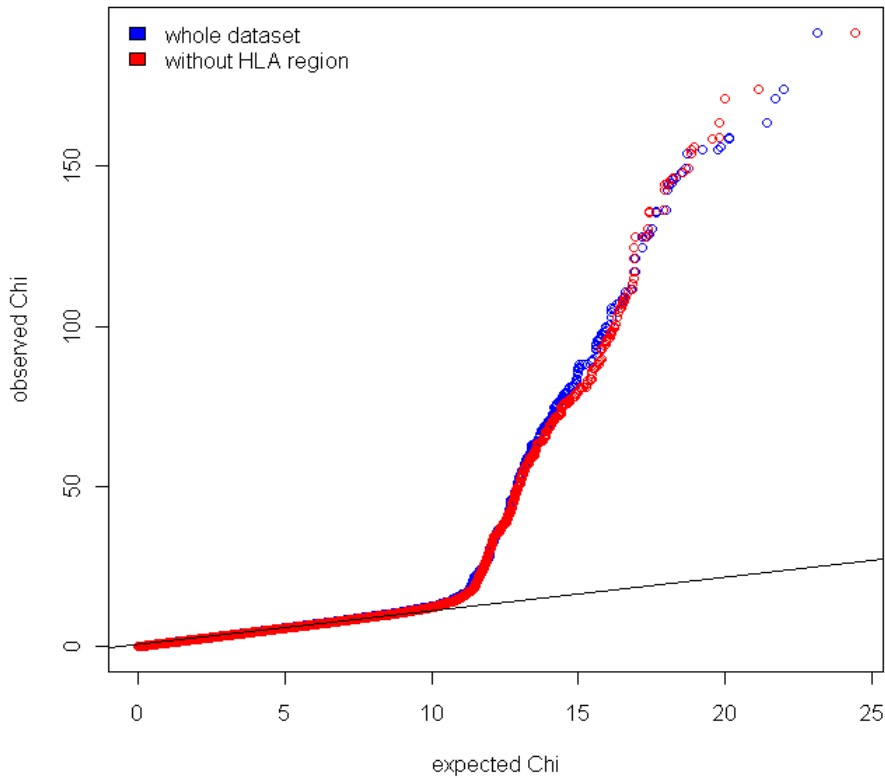

**Figure E5: Disease association of SNPs in the chromosome 6p22.33–p21.32 region, obtained from the GWAS, and overview of the genetic structure of the region around the most significantly associated SNPs.**

(A) Negative natural logarithm of the P values (allele-based  $\chi^2$  test) from the GWAS obtained in the region between positions 24,000 kb and 36,000 kb on chromosome 6. (B) Known genes in the region between positions 32,000 kb and 34,000 kb, including *BTNL2*, *HLA-DRA* and *HLA-DPB1*. The lower panel gives an overview of the linkage disequilibrium (LD) structure of the region, as measured by  $D'$ . The blocks were derived from the Caucasian HapMap genotypes. The coordinates refer to the NCBI NCBI36/hg18.

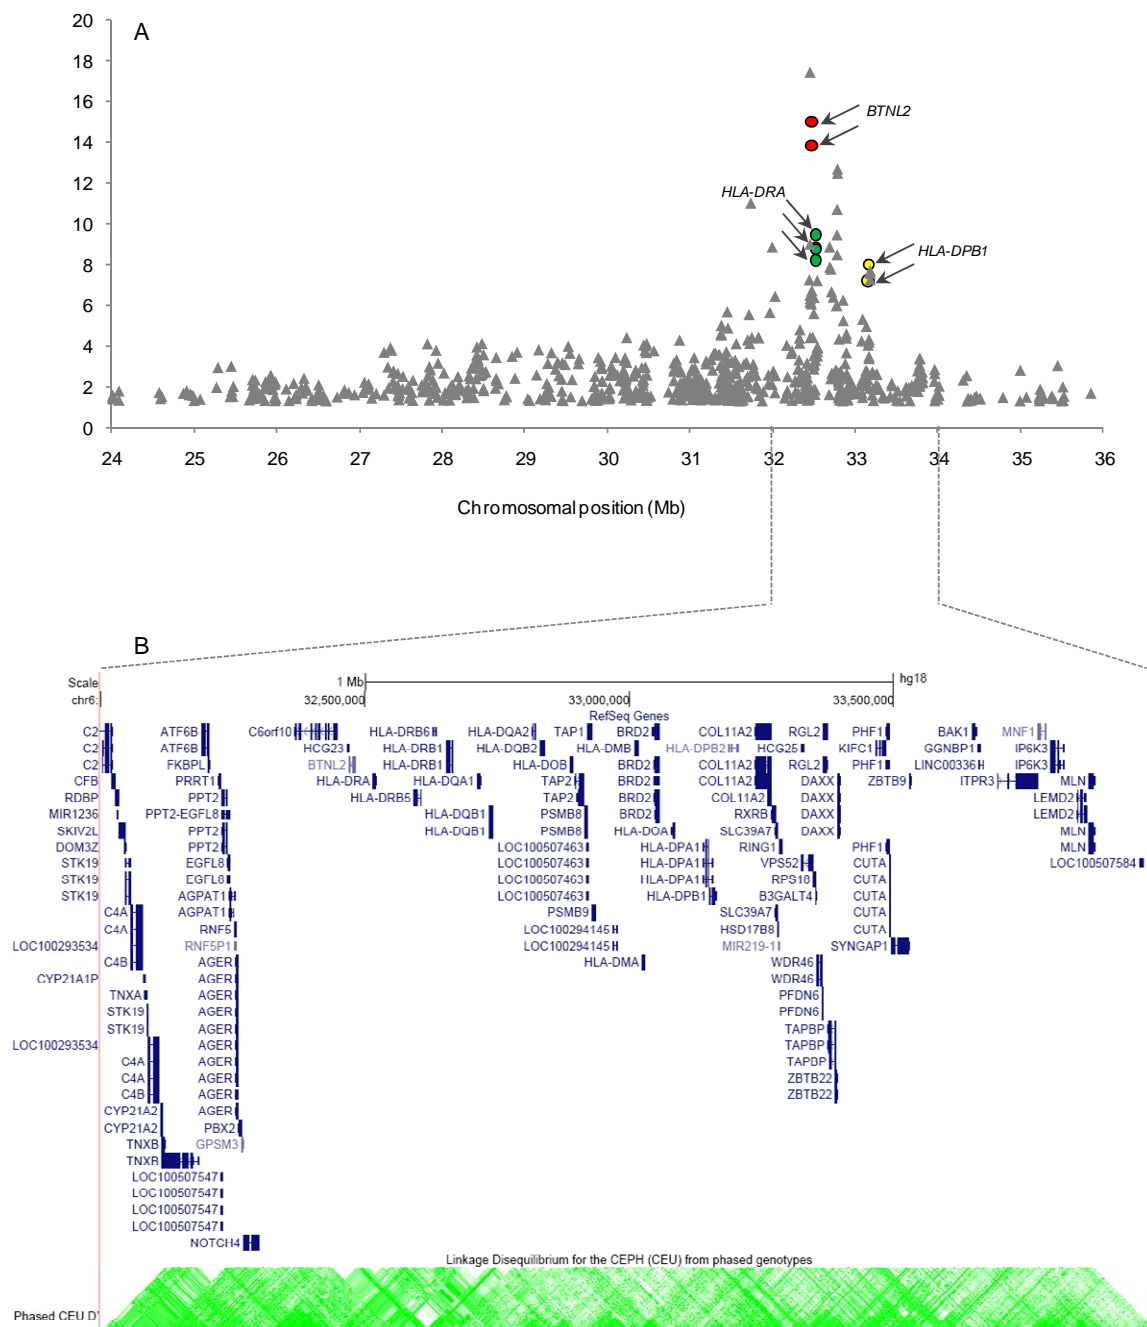

**Figure E6: Regional plots of the fine-mapped region around the lead SNP rs1050045.**

(A): Nominal  $-\log_{10} p$  values obtained in fine-mapping panel D. Association signal are shown for the sarcoidosis and the acute and chronic subphenotypes. (B): Recombination rate intensity (cM/Mb) and cumulative genetic distance (cM) from the lead SNP according to HapMap (Phase I + II, build 36). (C): Annotated Refseq genes. (D): Linkage disequilibrium structure ( $r^2$  in panel D controls).

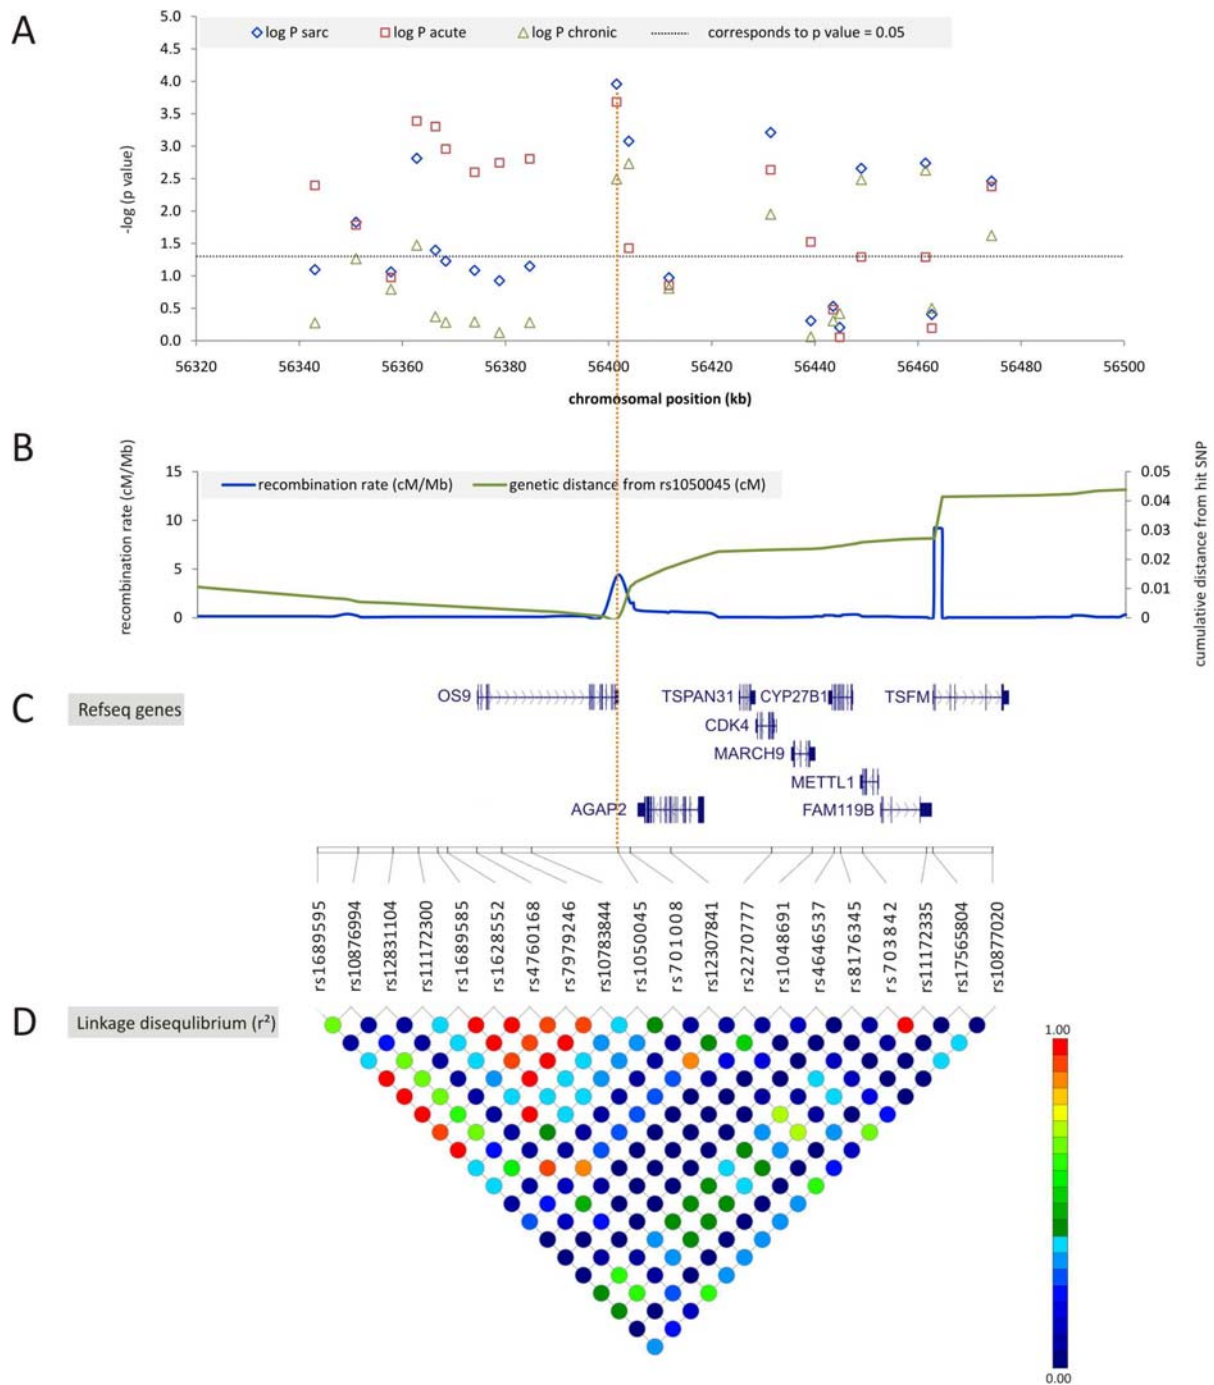

**Figure E7: Electropherogram for the two novel SNPs detected by Sanger sequencing.**

Plots are shown for the forward and reverse sequencing read.

(a) OS9-SNP1; chr12: 58,088,665 (hg18)

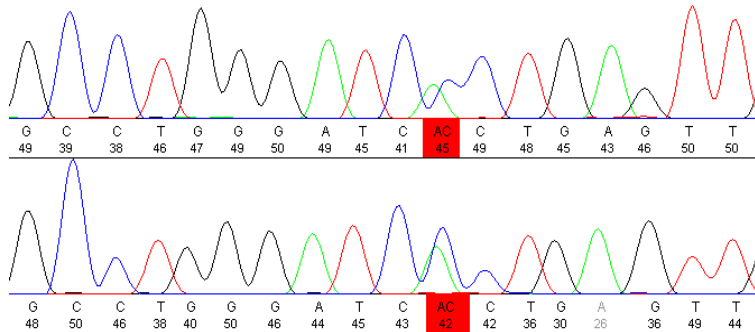

(b) OS9-SNP2; chr12: 58,114,081 (hg18)

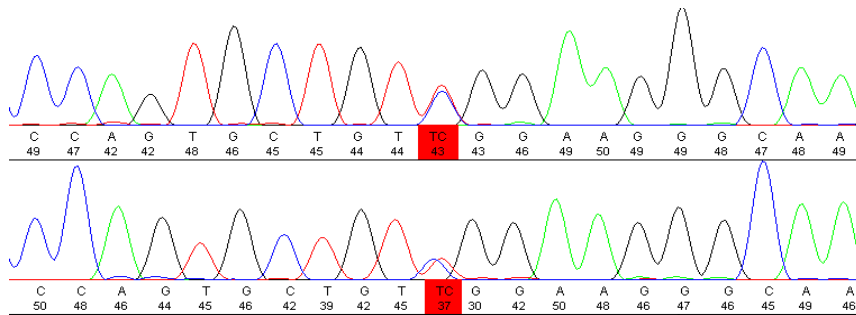

**Figure E8: Expression of eight candidate genes in various healthy tissues and immune cells.** Transcription levels of *OS9*, *AGAP2*, *TSPAN31*, *CDK4*, *MARCH9*, *CYP27B1*, *METTL1* and *FAM119B* were assessed using semi-quantitative PCR and were normalized on *GAPDH* mRNA levels.

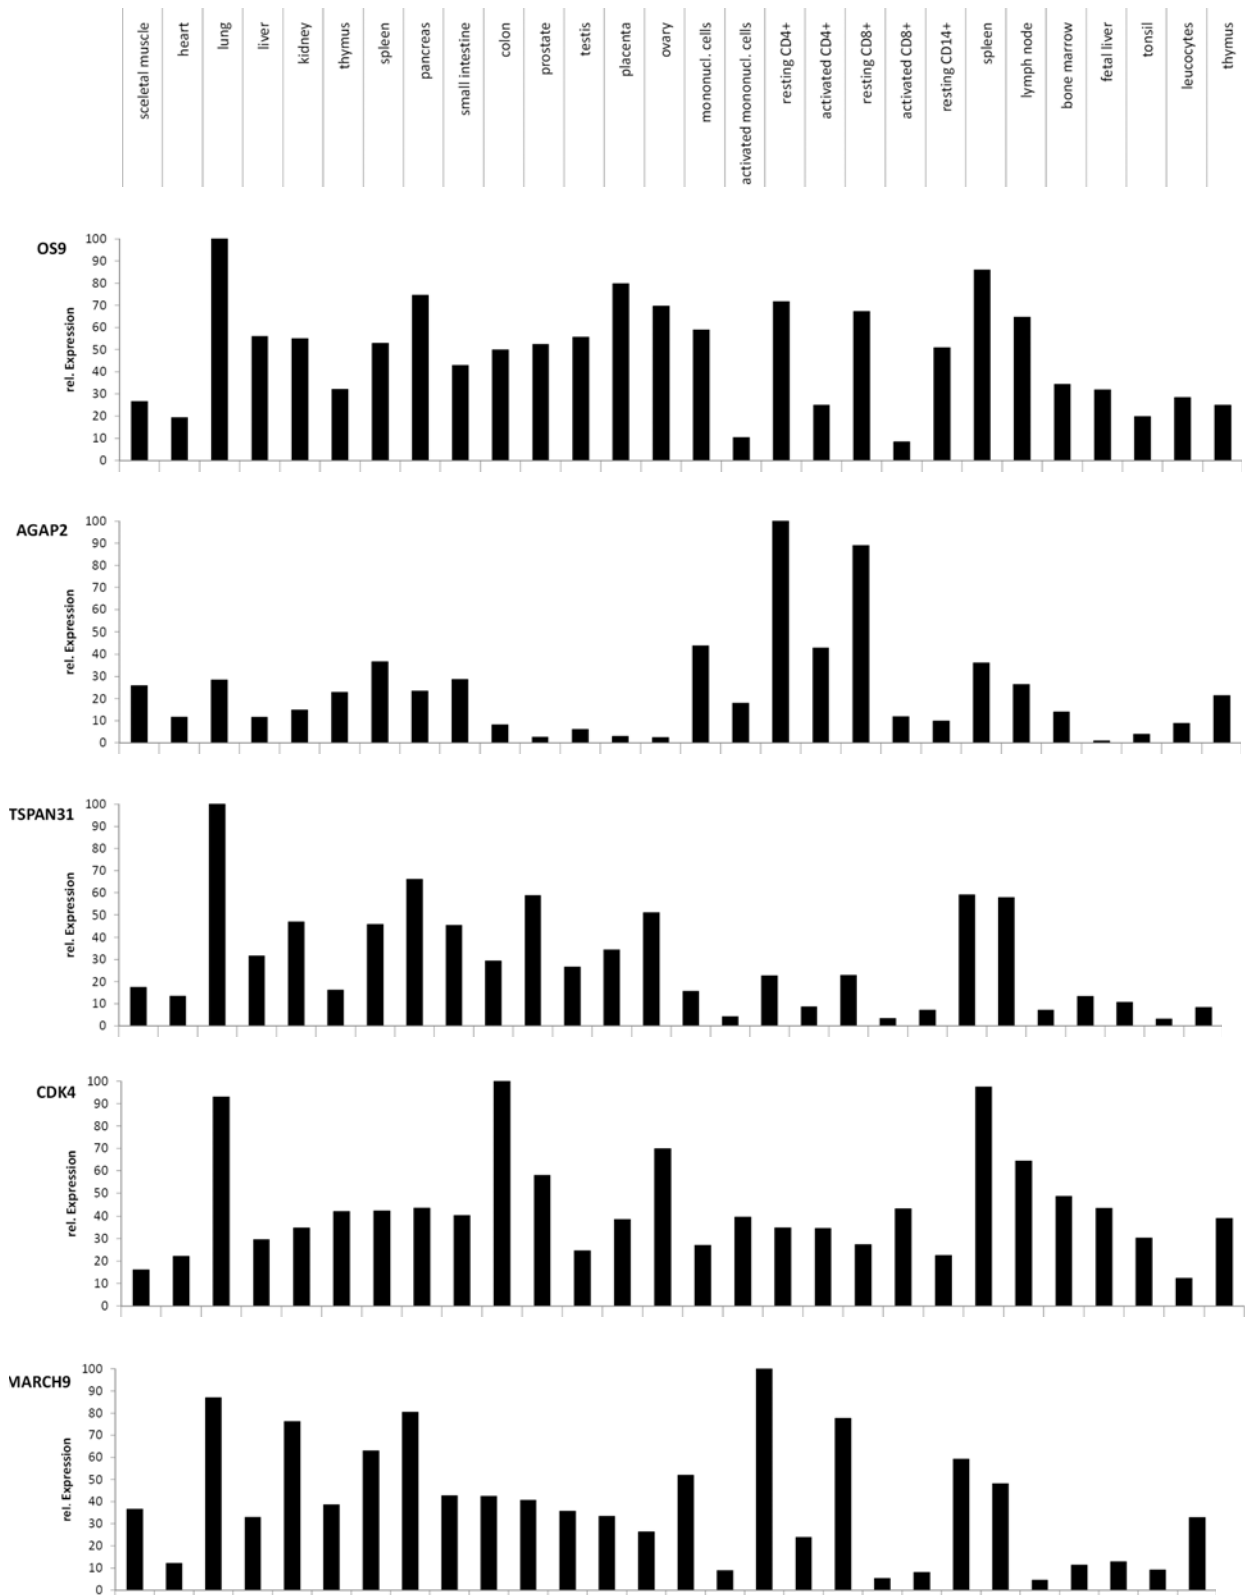

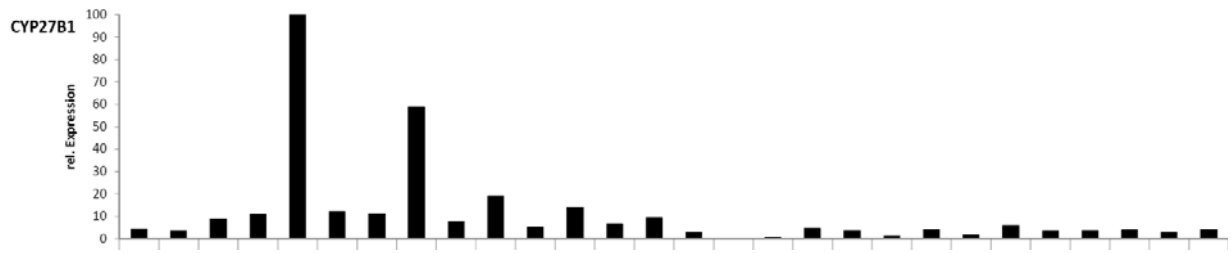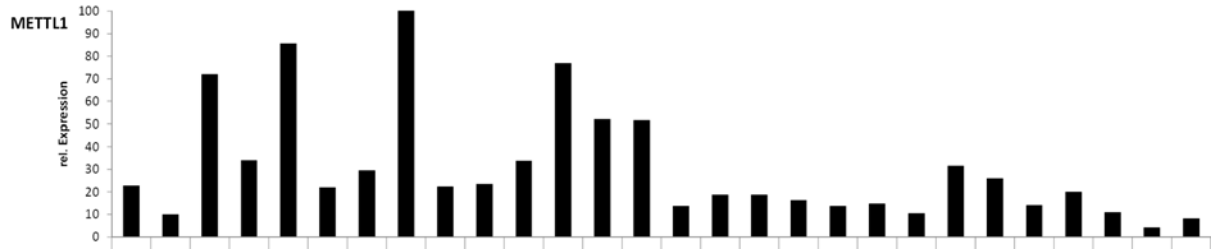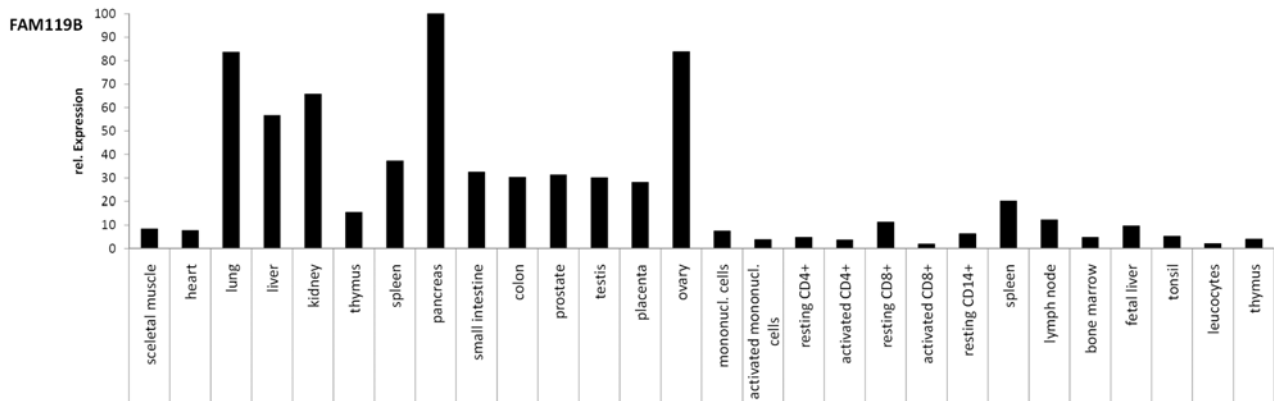



**Figure E9: Quantitative analysis of *OS9* expression in BAL cells.** Transcription levels of *OS9* in BAL cells were obtained for controls (C) and sarcoidosis patients from BAL panel II (see Material and Method section). In 8 out of 46 patients no *OS9* mRNA could be detected (negative). Differences in the *OS9* expression level were significant between *OS9*-positive (n = 38) compared to *OS9*-negative patients (n = 8) and compared to controls (n = 8).

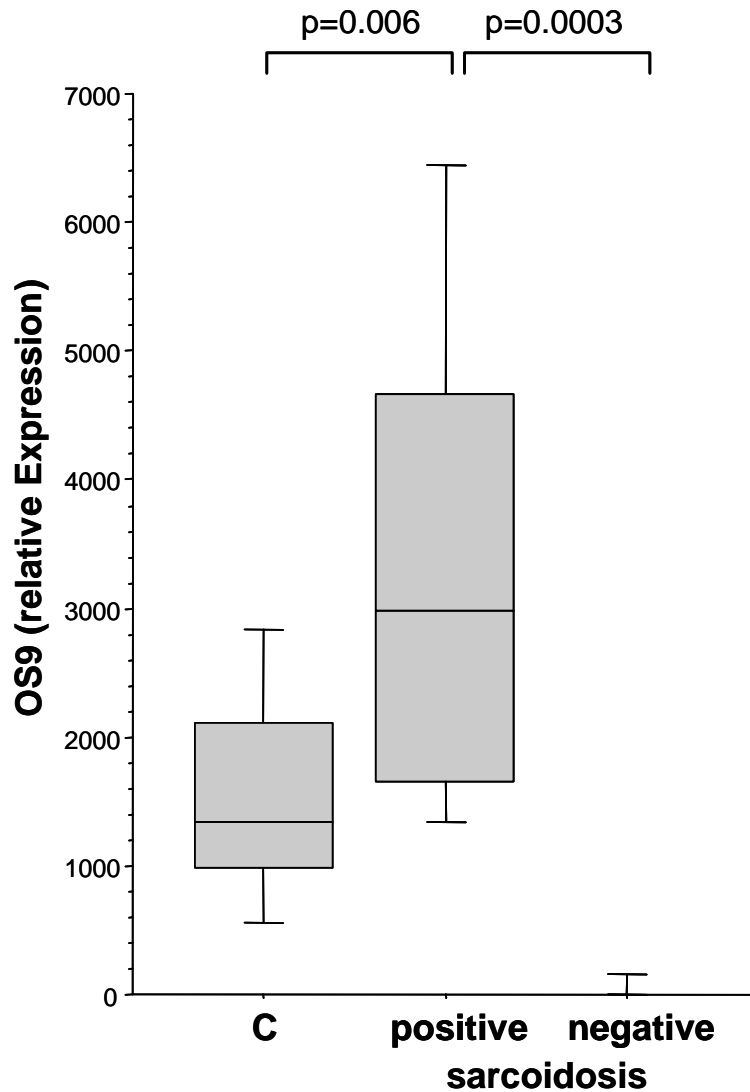

**Figure E10: Percentage of alveolar macrophages in BALs of *OS9*-positive and *OS9*-negative patients with sarcoidosis and controls (C) in BAL panel II.** BAL cell cells were fixed on stained by May-Grünwald-Giemsa and 300 cells were counted using a light microscope.

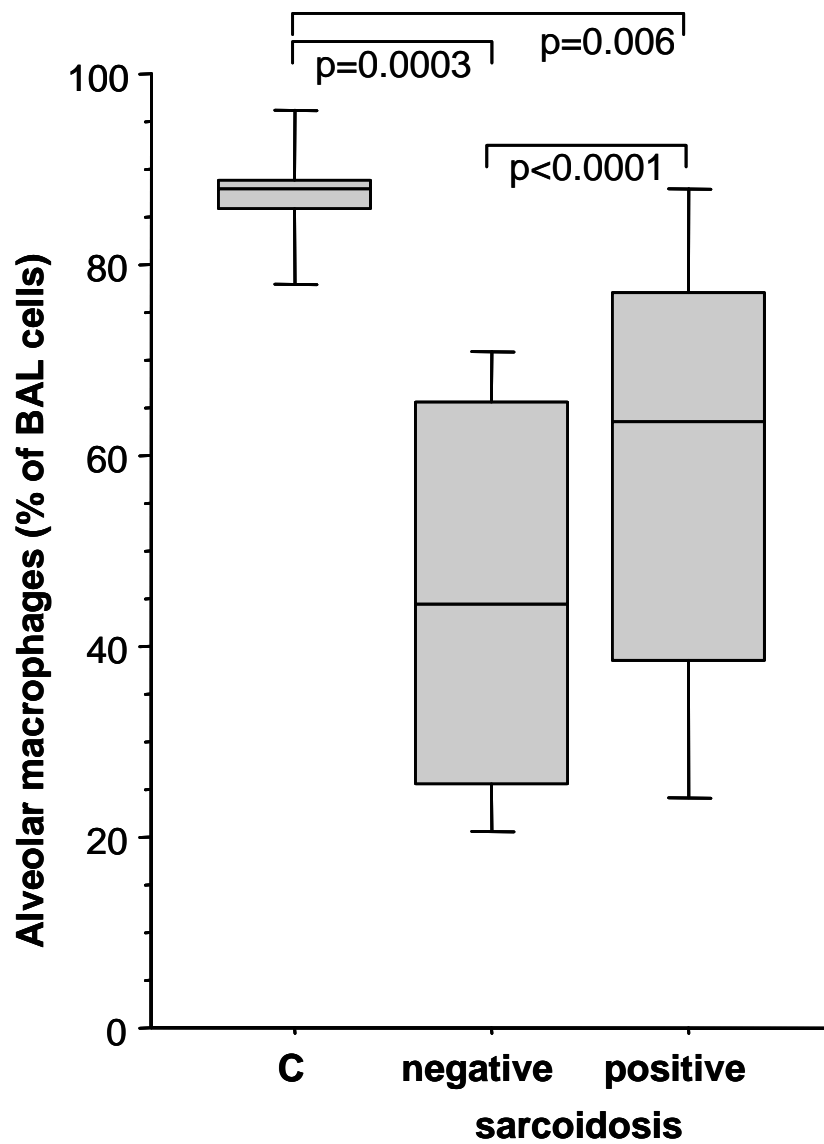

**Figure E11: HLA-DR<sup>+</sup> T lymphocytes in the BAL of OS9-positive and OS9-negative patients with sarcoidosis and controls in BAL panel II.** Isolated RNA of BAL cells from controls (C; n=4) and sarcoidosis patients either positive (n=33) or negative (n=8) was transcribed in cDNA and analysed by quantitative real-time PCR. BAL cells were allowed to sediment on poly-L-lysine-coated glass slides and HLA-DR expression was determined using peroxidase-labelled anti-HLA-DR antibodies. Approximately 300 cell were counted using a light microscope. The bars depict the percentage of HLA-DR<sup>+</sup> T lymphocytes in the BAL of controls (C) and OS9 positive and negative sarcoidosis patients.

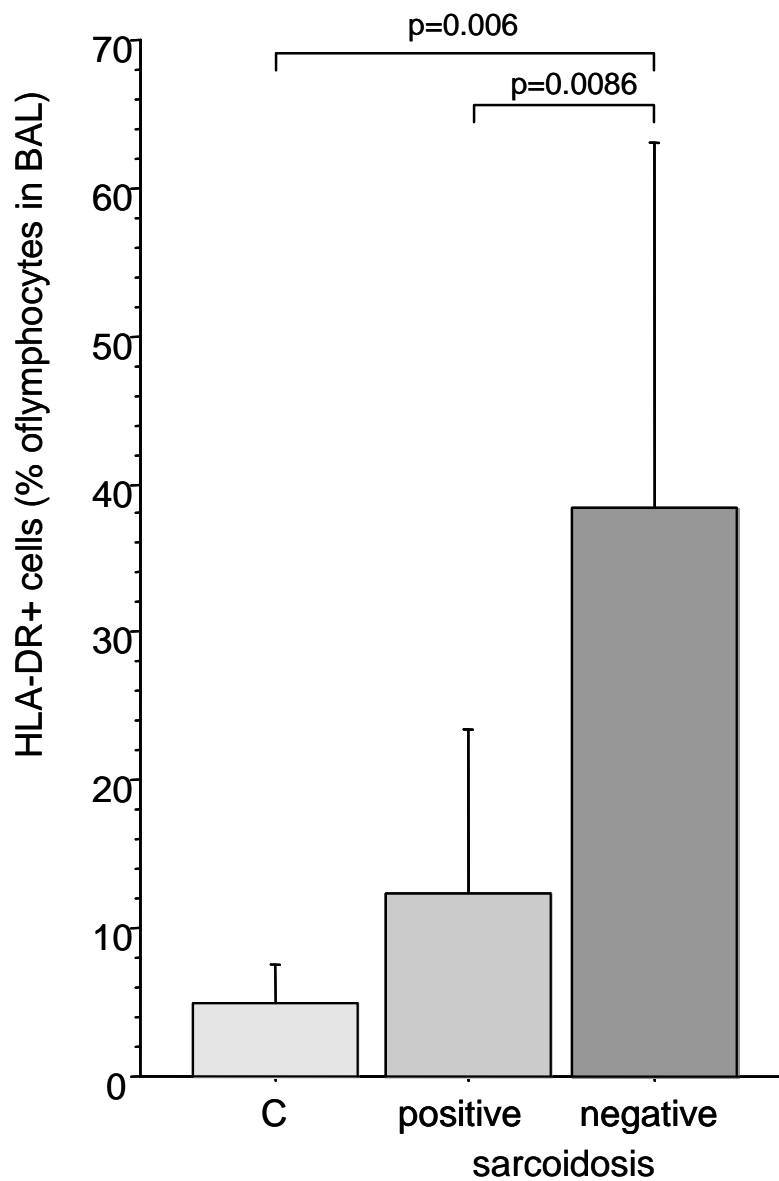

## Tables

**Table E1: SNPs used in the backward model selection in a logistic regression model.**

Additional to marker rs1050045, 21 markers of gene regions that have been previously identified as sarcoidosis susceptibility loci (*IL23R*, *BTNL2*, *HLA*, *Rab23* and *ANXA11*) entered the model. Positions are from NCBI build 36.

| dbSNP ID | Chr.      | Position | Gene                        | Reference |                                                          |
|----------|-----------|----------|-----------------------------|-----------|----------------------------------------------------------|
| 1        | rs6664119 | 67428483 | <i>IL23R</i>                | *         |                                                          |
| 6        | rs644045  | 31991936 | —                           |           | SNPs with genome-wide significance in the this GWA study |
| 6        | rs9268402 | 32449331 | <i>BTNL2</i>                |           |                                                          |
| 6        | rs9391858 | 32449376 | <i>BTNL2</i>                |           |                                                          |
| 6        | rs2076533 | 32471505 | <i>BTNL2</i>                |           |                                                          |
| 6        | rs2076530 | 32471794 | <i>BTNL2</i>                | [28]      |                                                          |
| 6        | rs3177928 | 32520413 | <i>HLA-DRA</i>              |           |                                                          |
| 6        | rs7194    | 32520458 | <i>HLA-DRA</i>              |           |                                                          |
| 6        | rs7195    | 32520517 | <i>HLA-DRA</i>              |           |                                                          |
| 6        | rs502771  | 32686948 | <i>HLA-DRB1/DQA1 region</i> |           |                                                          |
| 6        | rs4530903 | 32689867 | <i>HLA-DRB1/DQA1 region</i> |           |                                                          |
| 6        | rs9275371 | 32776274 | <i>HLA-DQ region</i>        |           |                                                          |
| 6        | rs9275418 | 32778222 | <i>HLA-DQ region</i>        |           |                                                          |
| 6        | rs2856717 | 32778286 | <i>HLA-DQ region</i>        |           |                                                          |
| 6        | rs9275522 | 32782948 | <i>HLA-DQ region</i>        |           |                                                          |
| 6        | rs9275523 | 32782972 | <i>HLA-DQ region</i>        |           |                                                          |
| 6        | rs9277550 | 33163465 | <i>HLA-DPB1</i>             |           |                                                          |
| 6        | rs3117242 | 33177871 | <i>HLA-DPB1/DPB2 region</i> |           |                                                          |
| 6        | rs3128923 | 33179300 | <i>HLA-DPB1/DPB2 region</i> |           |                                                          |
| 6        | rs3957366 | 57013233 | <i>BEND6 (Rab23)</i>        | [29]      |                                                          |
| 10       | rs1953600 | 81901705 | <i>ANXA11</i>               | [2]       |                                                          |
| 12       | rs1050045 | 56401538 | <i>OS9</i>                  |           |                                                          |

\*The Genome-Wide Human SNP Array 6.0 does not contain the SNP rs11209026 (*IL23R*) which has been reported previously to be associated with sarcoidosis [30]. Therefore, the most significantly associated SNP within the *IL23R* region was selected from the GWAS data set.

**Table E2: Primer used for the detection of variants in the *OS9* exonic, exon-flanking and regulatory regions.**

| #  | Name           | Sequence 5'→3'         | Usage     |
|----|----------------|------------------------|-----------|
| 1  | OS9_P1_L       | GCCCGCATTATTTCTCTAGG   | PCR + Seq |
|    | OS9_P1_R       | CTCGTTCCCAATTCAGAG     | PCR + Seq |
| 2  | OS9_P2_L       | TAGACCACGCCTCTGAAATTG  | PCR + Seq |
|    | OS9_P2_R       | AAACTGGACAGCAGCGTTTC   | PCR + Seq |
| 3  | OS9_P3_L       | CTGGAGGTCAACTGCAGGA    | PCR + Seq |
|    | OS9_P3_R       | CGTTCTATCCCTCCCACGTA   | PCR + Seq |
| 4  | OS9_E1_L       | GACCTTGAGCCACGTTTAC    | PCR + Seq |
|    | OS9_E1_R       | GCTGCCCTTCTTCTCTATC    | PCR + Seq |
| 5  | OS9_E2_L       | AGGGATTTGTTTGTCTCCC    | PCR + Seq |
|    | OS9_E2_R       | ACAGGTCCCCTAGATCCTGC   | PCR + Seq |
| 6  | OS9_E3-4_L     | AGCCAGGAGACTCTGGTTCC   | PCR + Seq |
|    | OS9_E3-4_R     | AGCTAATCTTGACCCTCCCC   | PCR + Seq |
| 7  | OS9_E5_L       | TTGTCTCTTTGGGGACGC     | PCR + Seq |
|    | OS9_E5_R       | TAAGATGCAACCCTTCTCCC   | PCR + Seq |
| 8  | OS9_E6-7.2_L   | AACCAATATCGCCTCACTGG   | PCR + Seq |
|    | OS9_E6-7.2_R   | CCTTCCCCTCTCTATCACC    | PCR + Seq |
| 9  | OS9_E6-7_L     | TGCTTAGTAAAAGACCTGCTC  | PCR + Seq |
|    | OS9_E6-7_R     | CACCCACCAGTCAGTCAG     | PCR + Seq |
| 10 | OS9_E8-9_L     | AAGGGACCCCATCCTATTTG   | PCR + Seq |
|    | OS9_E8-9_R     | CTTAGCTCTCCCCTCCATCC   | PCR + Seq |
| 11 | OS9_E11_L      | TGCTACTGTTTGTCTGCCCC   | PCR + Seq |
|    | OS9_E11_R      | TTCTTTTAGCCCGTCAGCC    | PCR + Seq |
| 12 | OS9_E12_L      | CTCCTACAGAGCCAGCCC     | PCR + Seq |
|    | OS9_E12_R      | AGAAGGGAAGGAACAGGGTC   | PCR + Seq |
| 13 | OS9_E13-14_L   | AGATGGAAGAGCTGCCAAAG   | PCR + Seq |
|    | OS9_E13-14_R   | AAATGGAAGCTCAGCAATGG   | PCR + Seq |
| 14 | OS9_E15_long_L | GACATGGGTGCTCTATTCC    | PCR       |
|    | OS9_E15_long_R | TGGTCTTCTCTGCATACCC    | PCR       |
| 15 | OS9_E15_1_L    | CATTCCCTGCCTTCCCC      | Seq       |
|    | OS9_E15_1_R    | AATCTCCAGGTAGGCAGCAG   | Seq       |
| 16 | OS9_E15_2_L    | TTGCTCTCCTGAACTCTCACTC | Seq       |
|    | OS9_E15_2_R    | GGAATGGGGAGCAAAGAAC    | Seq       |
| 17 | OS9_E15_3_L    | GACCTCTCGGGCAACTCTG    | Seq       |
|    | OS9_E15_3_R    | AAACATCACTAAGGGCAGGTG  | Seq       |

**Table E3: RT-PCR primer used for tissue-specific expression and BAL panel I.**

| Primer    | Sequence (5'-3')       |
|-----------|------------------------|
| OS9-F     | gaggagctgagtgagatgc    |
| OS9-R     | cccagagatactgcacc      |
| AGAP2-F   | gagagacaacaggagtg      |
| AGAP2-R   | ccgagccttcagtcttg      |
| TSPAN31-F | caagactcgggatgaactgg   |
| TSPAN31-R | tatgcactcacagaagcttc   |
| CDK4-F    | cctgattgggctgcctcc     |
| CDK4-R    | aatgggaaggagaaggagaagc |
| MARCH9-F  | tcgctcagcagtagcctgg    |
| MARCH9-R  | tggttcactgcctgccagc    |
| CYP27B1-F | ctttctggccgaactttctgc  |
| CYP27B1-R | gtggcgcagccagtgg       |
| METTL1-F  | gcgctactaccggcaacg     |
| METTL1-R  | aataagtgtctctgggaacagc |
| FAM119B-F | tgaccatcacgcagaacttgg  |
| FAM119B-R | gggaaggtgggtccagg      |

**Table E4: Primer pairs used for quantification of *OS9* mRNA expression (BAL panel II)**

Primer were synthesized by Biomers.

| Gene  | Forward primer       | Reversed primer     |
|-------|----------------------|---------------------|
| OS9   | gctgactgatgaggacacga | cggtaatgctctcagctc  |
| GAPDH | caccagggtgcttttaact  | gatctcgtcctggaagatg |

**Table E5: Association results from panels A and B for those 99 SNPs that were investigated in the validation stage.** Positions are in NCBI's build 36. A1 denotes the minor allele. Allele frequencies of A1 (AF) are shown for healthy control individuals (Co), sarcoidosis patients (SA) and the chronic and acute sarcoidosis subphenotypes. Genotyping counts are listed as numbers of homozygotes for the minor allele, heterozygotes and homozygotes for the major allele (A1A1/A1A2/A2A2). The nominal p values of the  $\chi^2$ -test for alleles (one degree of freedom) are shown. Significant p values ( $p < 0.05$ ) are highlighted in blue.

| chr | Position (bp) | dbSNP ID   | SNP           | A1 | rank | Screening panel A |                   |      |                |                       | Validation panel B |                |      |                |                       |         |                |                       |      |                |                       |
|-----|---------------|------------|---------------|----|------|-------------------|-------------------|------|----------------|-----------------------|--------------------|----------------|------|----------------|-----------------------|---------|----------------|-----------------------|------|----------------|-----------------------|
|     |               |            |               |    |      | AF Co             | SA                |      |                | AF                    | SA                 |                |      | acute          |                       | chronic |                |                       |      |                |                       |
|     |               |            |               |    |      |                   | A1A1/A1A2/A2A2 Co | AF   | A1A1/A1A2/A2A2 |                       | P                  | A1A1/A1A2/A2A2 | AF   | A1A1/A1A2/A2A2 | P                     | AF      | A1A1/A1A2/A2A2 | P                     | AF   | A1A1/A1A2/A2A2 | P                     |
| 1   | 18,032,082    | rs685987   | SNP_A-2302259 | A  | 45   | 0.37              | 166/583/482       | 0.31 | 64/266/306     | 1.72×10 <sup>-4</sup> | 0.35               | 350/1240/1160  | 0.35 | 185/691/647    | 6.83×10 <sup>-1</sup> | 0.33    | 50/244/220     | 2.68×10 <sup>-1</sup> | 0.35 | 112/383/371    | 8.72×10 <sup>-1</sup> |
| 1   | 71,190,213    | rs7548299  | SNP_A-2307198 | T  | 70   | 0.08              | 10/166/1057       | 0.11 | 7/126/504      | 3.98×10 <sup>-4</sup> | 0.09               | 18/460/2288    | 0.09 | 11/261/1297    | 9.35×10 <sup>-1</sup> | 0.08    | 3/82/444       | 5.05×10 <sup>-1</sup> | 0.09 | 7/155/732      | 5.23×10 <sup>-1</sup> |
| 1   | 73,896,164    | rs1497848  | SNP_A-8686347 | G  | 65   | 0.23              | 59/458/711        | 0.29 | 50/268/319     | 2.96×10 <sup>-4</sup> | 0.26               | 202/1048/1507  | 0.26 | 99/610/856     | 5.98×10 <sup>-1</sup> | 0.27    | 30/222/276     | 8.10×10 <sup>-1</sup> | 0.26 | 61/335/495     | 5.57×10 <sup>-1</sup> |
| 1   | 96,244,563    | rs321248   | SNP_A-2294898 | T  | 61   | 0.42              | 215/602/414       | 0.48 | 143/328/166    | 2.49×10 <sup>-4</sup> | 0.43               | 526/1334/892   | 0.45 | 316/784/469    | 1.10×10 <sup>-1</sup> | 0.45    | 96/283/150     | 3.45×10 <sup>-1</sup> | 0.45 | 190/428/276    | 1.67×10 <sup>-1</sup> |
| 1   | 148,862,161   | rs11204682 | SNP_A-1808322 | T  | 76   | 0.20              | 41/409/783        | 0.25 | 33/251/353     | 4.63×10 <sup>-4</sup> | 0.21               | 123/887/1726   | 0.21 | 80/487/952     | 5.20×10 <sup>-1</sup> | 0.22    | 27/176/309     | 2.09×10 <sup>-1</sup> | 0.21 | 50/270/547     | 5.81×10 <sup>-1</sup> |
| 1   | 209,920,803   | rs701924   | SNP_A-2108310 | A  | 25   | 0.29              | 98/520/614        | 0.35 | 70/311/256     | 7.31×10 <sup>-5</sup> | 0.31               | 299/1106/1340  | 0.32 | 165/666/732    | 4.28×10 <sup>-1</sup> | 0.33    | 53/243/231     | 1.82×10 <sup>-1</sup> | 0.31 | 98/364/428     | 7.33×10 <sup>-1</sup> |
| 1   | 223,595,288   | rs12728785 | SNP_A-8669527 | A  | 81   | 0.09              | 8/200/1025        | 0.06 | 3/65/569       | 5.22×10 <sup>-4</sup> | 0.08               | 17/426/2275    | 0.08 | 10/215/1323    | 1.57×10 <sup>-1</sup> | 0.06    | 3/58/462       | 1.13×10 <sup>-2</sup> | 0.08 | 4/133/745      | 5.47×10 <sup>-1</sup> |
| 2   | 39,136,188    | rs2060988  | SNP_A-8572874 | A  | 91   | 0.07              | 3/174/1045        | 0.11 | 11/113/508     | 5.99×10 <sup>-4</sup> | 0.08               | 14/420/2324    | 0.08 | 11/238/1318    | 7.76×10 <sup>-1</sup> | 0.08    | 4/81/445       | 7.55×10 <sup>-1</sup> | 0.09 | 6/141/744      | 5.25×10 <sup>-1</sup> |
| 2   | 45,348,647    | rs17033293 | SNP_A-8697812 | C  | 28   | 0.14              | 15/307/910        | 0.09 | 6/106/525      | 9.12×10 <sup>-5</sup> | 0.12               | 34/599/2079    | 0.10 | 21/277/1228    | 1.10×10 <sup>-2</sup> | 0.11    | 6/101/411      | 2.08×10 <sup>-1</sup> | 0.10 | 13/151/705     | 1.74×10 <sup>-2</sup> |
| 2   | 50,570,272    | rs10183541 | SNP_A-2208413 | G  | 90   | 0.11              | 11/256/964        | 0.15 | 23/148/466     | 5.98×10 <sup>-4</sup> | 0.12               | 35/612/2107    | 0.14 | 38/352/1177    | 8.86×10 <sup>-2</sup> | 0.14    | 9/129/392      | 1.82×10 <sup>-1</sup> | 0.14 | 24/193/674     | 2.08×10 <sup>-1</sup> |
| 2   | 61,778,577    | rs6736243  | SNP_A-2069217 | G  | 64   | 0.38              | 178/567/479       | 0.44 | 119/307/195    | 2.92×10 <sup>-4</sup> | 0.40               | 419/1355/975   | 0.41 | 262/753/547    | 3.68×10 <sup>-1</sup> | 0.41    | 91/251/184     | 4.39×10 <sup>-1</sup> | 0.40 | 145/430/315    | 6.72×10 <sup>-1</sup> |
| 2   | 113,633,383   | rs12475781 | SNP_A-8553121 | G  | 84   | 0.38              | 184/559/488       | 0.32 | 71/265/301     | 5.60×10 <sup>-4</sup> | 0.37               | 394/1242/1092  | 0.34 | 166/705/660    | 2.06×10 <sup>-3</sup> | 0.34    | 53/245/215     | 6.81×10 <sup>-2</sup> | 0.34 | 101/401/374    | 3.52×10 <sup>-2</sup> |
| 2   | 140,932,087   | rs16844001 | SNP_A-1923632 | G  | 39   | 0.04              | 2/91/1134         | 0.07 | 5/75/555       | 1.41×10 <sup>-4</sup> | 0.05               | 7/261/2486     | 0.05 | 9/142/1409     | 7.82×10 <sup>-1</sup> | 0.05    | 6/41/482       | 9.74×10 <sup>-1</sup> | 0.05 | 3/83/800       | 9.50×10 <sup>-1</sup> |
| 2   | 157,060,664   | rs297581   | SNP_A-2120508 | C  | 55   | 0.41              | 200/606/427       | 0.47 | 133/334/170    | 2.25×10 <sup>-4</sup> | 0.41               | 501/1252/978   | 0.42 | 280/715/535    | 7.19×10 <sup>-1</sup> | 0.42    | 92/253/172     | 5.62×10 <sup>-1</sup> | 0.42 | 169/400/302    | 4.30×10 <sup>-1</sup> |
| 2   | 195,374,603   | rs2191509  | SNP_A-1966341 | A  | 35   | 0.09              | 14/197/1022       | 0.13 | 11/146/480     | 1.23×10 <sup>-4</sup> | 0.10               | 31/484/2246    | 0.11 | 18/307/1241    | 1.17×10 <sup>-1</sup> | 0.11    | 8/103/418      | 1.80×10 <sup>-1</sup> | 0.11 | 9/170/713      | 4.30×10 <sup>-1</sup> |
| 2   | 203,264,771   | rs6748088  | SNP_A-8419961 | C  | 89   | 0.30              | 100/548/585       | 0.36 | 92/273/272     | 5.92×10 <sup>-4</sup> | 0.32               | 280/1200/1258  | 0.35 | 169/733/629    | 7.58×10 <sup>-3</sup> | 0.33    | 49/244/222     | 4.99×10 <sup>-1</sup> | 0.36 | 104/423/346    | 1.93E-03              |
| 2   | 207,453,139   | rs13429985 | SNP_A-8493426 | A  | 29   | 0.33              | 134/541/555       | 0.39 | 91/318/227     | 9.75×10 <sup>-5</sup> | 0.35               | 335/1236/1183  | 0.36 | 194/730/636    | 2.50×10 <sup>-1</sup> | 0.36    | 68/244/214     | 3.45×10 <sup>-1</sup> | 0.36 | 109/419/360    | 3.33×10 <sup>-1</sup> |
| 2   | 215,584,616   | rs10198064 | SNP_A-1961084 | C  | 5    | 0.06              | 5/146/1081        | 0.10 | 6/119/512      | 1.70×10 <sup>-5</sup> | 0.08               | 17/404/2332    | 0.09 | 13/256/1273    | 5.64×10 <sup>-2</sup> | 0.08    | 5/77/436       | 6.36×10 <sup>-1</sup> | 0.10 | 8/157/713      | 1.30×10 <sup>-2</sup> |
| 2   | 217,520,622   | rs1921998  | SNP_A-8505333 | C  | 92   | 0.47              | 267/625/339       | 0.41 | 106/311/218    | 6.06×10 <sup>-4</sup> | 0.46               | 542/1391/771   | 0.43 | 285/761/487    | 3.63×10 <sup>-2</sup> | 0.45    | 99/269/148     | 7.84×10 <sup>-1</sup> | 0.43 | 161/432/285    | 4.20×10 <sup>-2</sup> |
| 3   | 21,884,297    | rs2620534  | SNP_A-4219591 | T  | 58   | 0.47              | 271/616/346       | 0.41 | 102/314/221    | 2.41×10 <sup>-4</sup> | 0.44               | 516/1361/871   | 0.42 | 278/769/520    | 2.55×10 <sup>-1</sup> | 0.40    | 83/258/187     | 4.21×10 <sup>-2</sup> | 0.44 | 174/441/278    | 6.33×10 <sup>-1</sup> |
| 3   | 47,535,867    | rs7628631  | SNP_A-8582631 | T  | 63   | 0.37              | 173/573/487       | 0.43 | 129/295/213    | 2.70×10 <sup>-4</sup> | 0.38               | 390/1318/1050  | 0.40 | 233/781/546    | 7.65×10 <sup>-2</sup> | 0.40    | 72/276/178     | 2.48×10 <sup>-1</sup> | 0.40 | 137/438/313    | 1.21×10 <sup>-1</sup> |
| 3   | 52,119,987    | rs9847073  | SNP_A-8530530 | G  | 83   | 0.05              | 5/120/1107        | 0.08 | 3/98/536       | 5.52×10 <sup>-4</sup> | 0.06               | 10/299/2447    | 0.06 | 3/191/1362     | 3.07×10 <sup>-1</sup> | 0.07    | 1/72/453       | 1.21×10 <sup>-1</sup> | 0.06 | 2/99/783       | 9.64×10 <sup>-1</sup> |
| 3   | 69,788,306    | rs6549245  | SNP_A-8618182 | C  | 50   | 0.37              | 172/562/499       | 0.31 | 53/283/300     | 1.78×10 <sup>-4</sup> | 0.36               | 343/1290/1114  | 0.33 | 173/668/716    | 1.44×10 <sup>-3</sup> | 0.34    | 62/228/231     | 1.80×10 <sup>-1</sup> | 0.32 | 95/378/417     | 1.89×10 <sup>-3</sup> |
| 4   | 72,334,532    | rs1563045  | SNP_A-1977540 | T  | 51   | 0.12              | 22/254/955        | 0.17 | 21/168/446     | 1.84×10 <sup>-4</sup> | 0.13               | 61/619/2083    | 0.14 | 39/361/1166    | 4.29×10 <sup>-1</sup> | 0.13    | 11/115/402     | 6.92×10 <sup>-1</sup> | 0.14 | 24/206/662     | 3.85×10 <sup>-1</sup> |







|    |            |            |               |   |    |      |             |      |            |                       |      |               |      |             |                       |      |            |                       |      |             |                       |
|----|------------|------------|---------------|---|----|------|-------------|------|------------|-----------------------|------|---------------|------|-------------|-----------------------|------|------------|-----------------------|------|-------------|-----------------------|
| 19 | 37,958,000 | rs6510287  | SNP_A-4268916 | C | 21 | 0.02 | 0/38/1192   | 0.04 | 2/42/592   | $5.25 \times 10^{-5}$ | 0.02 | 0/103/2658    | 0.02 | 1/56/1504   | $9.80 \times 10^{-1}$ | 0.02 | 0/21/508   | $7.89 \times 10^{-1}$ | 0.02 | 1/28/858    | $6.38 \times 10^{-1}$ |
| 19 | 56,846,717 | rs10412972 | SNP_A-1828486 | A | 52 | 0.18 | 40/354/838  | 0.13 | 16/132/488 | $1.92 \times 10^{-4}$ | 0.15 | 68/714/1977   | 0.15 | 23/407/1126 | $2.91 \times 10^{-1}$ | 0.13 | 7/126/391  | $8.51 \times 10^{-2}$ | 0.15 | 12/241/634  | $6.12 \times 10^{-1}$ |
| 20 | 15,471,295 | rs1233729  | SNP_A-1950277 | A | 79 | 0.30 | 107/534/592 | 0.36 | 73/312/252 | $4.96 \times 10^{-4}$ | 0.32 | 274/1207/1278 | 0.32 | 150/705/714 | $8.32 \times 10^{-1}$ | 0.32 | 37/268/225 | $7.73 \times 10^{-1}$ | 0.32 | 94/377/422  | $8.88 \times 10^{-1}$ |
| 20 | 45,011,328 | rs1206754  | SNP_A-8577489 | T | 15 | 0.02 | 1/39/1193   | 0.04 | 3/43/591   | $3.63 \times 10^{-5}$ | 0.02 | 1/102/2663    | 0.02 | 3/61/1505   | $4.12 \times 10^{-1}$ | 0.03 | 2/27/501   | $2.73 \times 10^{-2}$ | 0.02 | 1/34/859    | $7.15 \times 10^{-1}$ |
| 20 | 58,478,034 | rs6128829  | SNP_A-2224064 | A | 46 | 0.39 | 195/562/476 | 0.32 | 63/285/287 | $1.73 \times 10^{-4}$ | 0.35 | 358/1223/1176 | 0.35 | 195/709/653 | $9.05 \times 10^{-1}$ | 0.34 | 61/236/229 | $4.71 \times 10^{-1}$ | 0.36 | 118/396/372 | $7.13 \times 10^{-1}$ |
| 20 | 59,267,891 | rs6101283  | SNP_A-2140517 | A | 82 | 0.14 | 20/299/913  | 0.10 | 7/111/519  | $5.23 \times 10^{-4}$ | 0.11 | 42/529/2155   | 0.12 | 25/314/1204 | $4.42 \times 10^{-1}$ | 0.12 | 7/108/406  | $6.66 \times 10^{-1}$ | 0.11 | 13/176/691  | $7.89 \times 10^{-1}$ |
| 22 | 27,657,907 | rs5762900  | SNP_A-1805590 | A | 93 | 0.06 | 3/131/1096  | 0.03 | 1/37/599   | $6.07 \times 10^{-4}$ | 0.06 | 6/316/2422    | 0.05 | 2/156/1387  | $1.25 \times 10^{-1}$ | 0.05 | 1/51/469   | $2.65 \times 10^{-1}$ | 0.05 | 1/81/799    | $4.69 \times 10^{-2}$ |

**Table E6: Association results for those 53 SNPs genotyped in fine-mapping panel D**

Positions are in NCBI's build 36. The minor allele is denoted by A1. Allele frequencies for A1 (AF) are given in healthy controls (Co) and sarcoidosis patients (SA). The numbers of homozygotes for the minor allele, heterozygotes and homozygotes for the major allele (A1A1/A1A2/A2A2) are given. Nominal p values of a  $\chi^2$ -test for alleles (one degree of freedom) are shown. Significant p values ( $p < 0.05$ ) are highlighted in brown and blue, respectively. Odds ratios (OR) and 95% confidence intervals (95% CI) are listed for of the rare A1 allele.

| dbSNP ID   | Position (bp) | A1 | Co   |                | SA   |                |                       |                  | acute |                |                       |                  | chronic |                |                       |                  |
|------------|---------------|----|------|----------------|------|----------------|-----------------------|------------------|-------|----------------|-----------------------|------------------|---------|----------------|-----------------------|------------------|
|            |               |    | AF   | A1A1/A1A2/A2A2 | AF   | A1A1/A1A2/A2A2 | P                     | OR [CI 95%]      | AF    | A1A1/A1A2/A2A2 | P                     | OR [CI 95%]      | AF      | A1A1/A1A2/A2A2 | PA                    | OR [CI 95%]      |
| rs12831733 | 56,122,056    | C  | 0.03 | 2/82/1339      | 0.03 | 2/100/1638     | 9.39×10 <sup>-1</sup> | 0.99 [0.74-1.32] | 0.02  | 1/24/541       | 2.14×10 <sup>-1</sup> | 0.76 [0.48-1.18] | 0.03    | 1/64/948       | 6.38×10 <sup>-1</sup> | 1.08 [0.78-1.50] |
| rs2229357  | 56,129,978    | A  | 0.25 | 96/511/816     | 0.25 | 113/625/988    | 9.64×10 <sup>-1</sup> | 1.00 [0.89-1.12] | 0.27  | 49/212/303     | 6.79×10 <sup>-2</sup> | 1.16 [0.99-1.35] | 0.23    | 58/351/594     | 2.60×10 <sup>-1</sup> | 0.93 [0.81-1.06] |
| rs507562   | 56,136,035    | C  | 0.24 | 75/534/815     | 0.23 | 77/665/1007    | 5.74×10 <sup>-1</sup> | 0.97 [0.86-1.09] | 0.22  | 21/210/340     | 1.93×10 <sup>-1</sup> | 0.90 [0.76-1.06] | 0.24    | 49/380/587     | 7.00×10 <sup>-1</sup> | 0.97 [0.85-1.11] |
| rs2242578  | 56,139,420    | G  | 0.33 | 140/646/632    | 0.32 | 166/768/807    | 3.69×10 <sup>-1</sup> | 0.95 [0.86-1.06] | 0.31  | 51/247/272     | 2.10×10 <sup>-1</sup> | 0.91 [0.78-1.06] | 0.32    | 99/445/467     | 5.26×10 <sup>-1</sup> | 0.96 [0.85-1.09] |
| rs1678537  | 56,186,608    | A  | 0.11 | 14/281/1111    | 0.12 | 23/357/1355    | 4.37×10 <sup>-1</sup> | 1.06 [0.91-1.25] | 0.12  | 8/117/438      | 4.55×10 <sup>-1</sup> | 1.09 [0.87-1.35] | 0.12    | 15/205/793     | 5.02×10 <sup>-1</sup> | 1.06 [0.89-1.27] |
| rs775241   | 56,222,594    | G  | 0.12 | 17/320/1086    | 0.13 | 28/387/1323    | 7.15×10 <sup>-1</sup> | 1.03 [0.89-1.19] | 0.13  | 12/125/433     | 5.82×10 <sup>-1</sup> | 1.06 [0.86-1.30] | 0.13    | 16/222/770     | 8.60×10 <sup>-1</sup> | 1.02 [0.85-1.21] |
| rs730560   | 56,224,832    | C  | 0.44 | 274/689/455    | 0.44 | 343/860/539    | 5.47×10 <sup>-1</sup> | 1.03 [0.93-1.14] | 0.42  | 104/273/190    | 4.88×10 <sup>-1</sup> | 0.95 [0.83-1.09] | 0.46    | 211/506/297    | 1.39×10 <sup>-1</sup> | 1.09 [0.97-1.22] |
| rs11172247 | 56,232,777    | G  | 0.37 | 174/702/549    | 0.34 | 202/781/758    | 1.99×10 <sup>-2</sup> | 0.88 [0.80-0.98] | 0.34  | 75/240/254     | 1.31×10 <sup>-1</sup> | 0.89 [0.77-1.03] | 0.34    | 112/461/439    | 3.27×10 <sup>-2</sup> | 0.88 [0.78-0.99] |
| rs1678542  | 56,254,982    | C  | 0.37 | 170/696/552    | 0.34 | 192/778/753    | 2.01×10 <sup>-2</sup> | 0.88 [0.80-0.98] | 0.34  | 68/243/252     | 9.17×10 <sup>-2</sup> | 0.88 [0.76-1.02] | 0.34    | 108/458/435    | 4.19×10 <sup>-2</sup> | 0.88 [0.78-1.00] |
| rs2888334  | 56,262,914    | C  | 0.29 | 103/624/689    | 0.27 | 123/688/916    | 4.66×10 <sup>-2</sup> | 0.89 [0.80-1.00] | 0.27  | 41/223/305     | 1.17×10 <sup>-1</sup> | 0.88 [0.76-1.03] | 0.27    | 71/396/531     | 7.64×10 <sup>-2</sup> | 0.89 [0.78-1.01] |
| rs775250   | 56,263,307    | A  | 0.27 | 99/559/761     | 0.29 | 141/712/862    | 4.28×10 <sup>-2</sup> | 1.12 [1.00-1.25] | 0.31  | 58/230/273     | 8.70×10 <sup>-3</sup> | 1.23 [1.05-1.43] | 0.28    | 74/409/514     | 3.39×10 <sup>-1</sup> | 1.07 [0.94-1.21] |
| rs1678536  | 56,265,457    | G  | 0.30 | 122/606/696    | 0.26 | 121/672/953    | 1.18×10 <sup>-3</sup> | 0.83 [0.75-0.93] | 0.26  | 38/223/308     | 2.54×10 <sup>-2</sup> | 0.84 [0.72-0.98] | 0.26    | 71/390/556     | 5.01×10 <sup>-3</sup> | 0.83 [0.73-0.95] |
| rs1545783  | 56,268,521    | T  | 0.25 | 82/560/779     | 0.28 | 124/738/876    | 1.01×10 <sup>-2</sup> | 1.16 [1.04-1.30] | 0.31  | 47/254/268     | 1.08×10 <sup>-3</sup> | 1.29 [1.11-1.50] | 0.27    | 66/415/527     | 2.00×10 <sup>-1</sup> | 1.09 [0.96-1.24] |
| rs1284185  | 56,275,310    | A  | 0.03 | 1/86/1338      | 0.03 | 0/114/1639     | 7.11×10 <sup>-1</sup> | 1.06 [0.80-1.40] | 0.03  | 0/36/536       | 9.20×10 <sup>-1</sup> | 1.02 [0.69-1.51] | 0.04    | 0/72/947       | 3.86×10 <sup>-1</sup> | 1.15 [0.84-1.58] |
| rs812315   | 56,279,757    | C  | 0.22 | 63/494/865     | 0.24 | 98/630/1016    | 7.62×10 <sup>-2</sup> | 1.11 [0.99-1.25] | 0.26  | 38/221/310     | 3.77×10 <sup>-3</sup> | 1.27 [1.08-1.48] | 0.22    | 51/346/617     | 8.22×10 <sup>-1</sup> | 1.02 [0.89-1.17] |
| rs2306390  | 56,288,866    | T  | 0.28 | 97/589/737     | 0.24 | 94/653/1002    | 1.63×10 <sup>-3</sup> | 0.83 [0.74-0.93] | 0.23  | 32/201/339     | 4.95×10 <sup>-3</sup> | 0.80 [0.68-0.93] | 0.24    | 53/386/576     | 1.07×10 <sup>-2</sup> | 0.84 [0.74-0.96] |
| rs2277323  | 56,295,639    | A  | 0.25 | 81/542/798     | 0.24 | 93/633/1002    | 3.22×10 <sup>-1</sup> | 0.94 [0.84-1.06] | 0.25  | 42/198/320     | 7.81×10 <sup>-1</sup> | 1.02 [0.87-1.20] | 0.23    | 42/375/592     | 1.06×10 <sup>-1</sup> | 0.90 [0.78-1.02] |
| rs1552842  | 56,298,430    | A  | 0.41 | 248/648/502    | 0.44 | 326/845/530    | 1.44×10 <sup>-2</sup> | 1.14 [1.03-1.26] | 0.45  | 117/266/172    | 1.96×10 <sup>-2</sup> | 1.18 [1.03-1.36] | 0.44    | 181/508/303    | 4.59×10 <sup>-2</sup> | 1.13 [1.00-1.27] |
| rs2277324  | 56,299,442    | A  | 0.38 | 210/665/547    | 0.42 | 307/869/569    | 4.63×10 <sup>-4</sup> | 1.20 [1.08-1.33] | 0.43  | 113/265/193    | 5.07×10 <sup>-3</sup> | 1.22 [1.06-1.40] | 0.43    | 167/528/318    | 2.24×10 <sup>-3</sup> | 1.20 [1.07-1.35] |
| rs923828   | 56,301,761    | T  | 0.40 | 232/676/509    | 0.44 | 323/865/529    | 2.60×10 <sup>-3</sup> | 1.17 [1.06-1.29] | 0.45  | 115/269/174    | 1.07×10 <sup>-2</sup> | 1.20 [1.04-1.38] | 0.44    | 178/517/303    | 1.60×10 <sup>-2</sup> | 1.15 [1.03-1.30] |
| rs1871417  | 56,305,246    | A  | 0.33 | 129/676/618    | 0.31 | 161/751/827    | 9.46×10 <sup>-2</sup> | 0.91 [0.82-1.02] | 0.28  | 50/220/296     | 5.55×10 <sup>-3</sup> | 0.81 [0.69-0.94] | 0.32    | 92/461/458     | 5.11×10 <sup>-1</sup> | 0.96 [0.85-1.08] |
| rs813516   | 56,307,092    | T  | 0.02 | 1/59/1362      | 0.02 | 0/56/1695      | 1.08×10 <sup>-1</sup> | 0.74 [0.51-1.07] | 0.02  | 0/21/550       | 5.40×10 <sup>-1</sup> | 0.86 [0.52-1.41] | 0.02    | 0/33/986       | 1.89×10 <sup>-1</sup> | 0.75 [0.49-1.15] |
| rs12320537 | 56,307,358    | C  | 0.23 | 67/510/834     | 0.21 | 77/588/1078    | 1.43×10 <sup>-1</sup> | 0.91 [0.81-1.03] | 0.23  | 32/192/345     | 8.34×10 <sup>-1</sup> | 0.98 [0.83-1.16] | 0.20    | 36/342/635     | 4.87×10 <sup>-2</sup> | 0.87 [0.76-1.00] |

|            |            |   |      |             |      |             |                       |                  |      |             |                       |                  |      |             |                       |                  |
|------------|------------|---|------|-------------|------|-------------|-----------------------|------------------|------|-------------|-----------------------|------------------|------|-------------|-----------------------|------------------|
| rs715930   | 56,310,248 | T | 0.23 | 67/512/846  | 0.21 | 76/589/1084 | 1.55×10 <sup>-1</sup> | 0.92 [0.81-1.03] | 0.23 | 32/193/345  | 9.42×10 <sup>-1</sup> | 0.99 [0.84-1.17] | 0.20 | 35/342/641  | 4.33×10 <sup>-2</sup> | 0.87 [0.75-1.00] |
| rs1689595  | 56,343,030 | G | 0.36 | 164/672/571 | 0.33 | 190/782/766 | 8.02×10 <sup>-2</sup> | 0.91 [0.82-1.01] | 0.31 | 62/223/280  | 4.02×10 <sup>-3</sup> | 0.80 [0.69-0.93] | 0.35 | 109/483/420 | 5.29×10 <sup>-1</sup> | 0.96 [0.85-1.09] |
| rs10876994 | 56,351,004 | C | 0.27 | 86/595/742  | 0.24 | 94/663/996  | 1.49×10 <sup>-2</sup> | 0.87 [0.78-0.97] | 0.23 | 33/200/339  | 1.64×10 <sup>-2</sup> | 0.82 [0.70-0.96] | 0.24 | 51/397/571  | 5.43×10 <sup>-2</sup> | 0.88 [0.77-1.00] |
| rs12831104 | 56,357,782 | G | 0.13 | 30/316/1077 | 0.12 | 19/374/1355 | 8.67×10 <sup>-2</sup> | 0.88 [0.76-1.02] | 0.11 | 9/111/450   | 1.06×10 <sup>-1</sup> | 0.84 [0.68-1.04] | 0.12 | 9/223/785   | 1.61×10 <sup>-1</sup> | 0.88 [0.74-1.05] |
| rs11172300 | 56,362,782 | T | 0.40 | 234/665/526 | 0.44 | 334/858/554 | 1.54×10 <sup>-3</sup> | 1.18 [1.06-1.30] | 0.46 | 133/259/180 | 4.09×10 <sup>-4</sup> | 1.28 [1.12-1.47] | 0.43 | 174/519/319 | 3.35×10 <sup>-2</sup> | 1.13 [1.01-1.27] |
| rs1689585  | 56,366,407 | G | 0.36 | 161/676/565 | 0.33 | 176/773/750 | 4.02×10 <sup>-2</sup> | 0.90 [0.81-1.00] | 0.30 | 54/220/278  | 4.98×10 <sup>-4</sup> | 0.77 [0.66-0.89] | 0.34 | 102/476/409 | 4.25×10 <sup>-1</sup> | 0.95 [0.84-1.07] |
| rs1628552  | 56,368,409 | C | 0.36 | 165/683/575 | 0.33 | 191/786/775 | 5.92×10 <sup>-2</sup> | 0.90 [0.82-1.00] | 0.30 | 61/223/288  | 1.10×10 <sup>-3</sup> | 0.78 [0.67-0.91] | 0.35 | 110/486/422 | 5.19×10 <sup>-1</sup> | 0.96 [0.85-1.08] |
| rs4760168  | 56,374,004 | T | 0.35 | 160/679/581 | 0.33 | 188/775/776 | 8.23×10 <sup>-2</sup> | 0.91 [0.82-1.01] | 0.30 | 60/223/286  | 2.52×10 <sup>-3</sup> | 0.80 [0.69-0.92] | 0.34 | 107/477/425 | 5.12×10 <sup>-1</sup> | 0.96 [0.85-1.08] |
| rs7979246  | 56,378,821 | A | 0.34 | 156/663/598 | 0.33 | 182/746/778 | 1.18×10 <sup>-1</sup> | 0.92 [0.83-1.02] | 0.29 | 57/205/285  | 1.80×10 <sup>-3</sup> | 0.79 [0.68-0.91] | 0.34 | 105/468/426 | 7.48×10 <sup>-1</sup> | 0.98 [0.87-1.11] |
| rs10783844 | 56,384,692 | A | 0.36 | 169/680/576 | 0.34 | 197/779/772 | 7.10×10 <sup>-2</sup> | 0.91 [0.82-1.01] | 0.30 | 63/221/286  | 1.57×10 <sup>-3</sup> | 0.79 [0.68-0.91] | 0.35 | 113/482/422 | 5.23×10 <sup>-1</sup> | 0.96 [0.85-1.08] |
| rs1050045  | 56,401,538 | C | 0.40 | 231/662/510 | 0.45 | 346/863/522 | 1.10×10 <sup>-4</sup> | 1.22 [1.10-1.35] | 0.47 | 132/262/171 | 2.08×10 <sup>-4</sup> | 1.30 [1.13-1.50] | 0.44 | 186/522/300 | 3.20×10 <sup>-3</sup> | 1.19 [1.06-1.34] |
| rs701008   | 56,403,912 | G | 0.39 | 217/678/528 | 0.35 | 205/808/727 | 8.36×10 <sup>-4</sup> | 0.84 [0.76-0.93] | 0.36 | 69/266/234  | 3.74×10 <sup>-2</sup> | 0.86 [0.74-0.99] | 0.35 | 114/473/424 | 1.85×10 <sup>-3</sup> | 0.83 [0.74-0.93] |
| rs12307841 | 56,411,705 | C | 0.13 | 29/311/1075 | 0.12 | 19/371/1358 | 1.07×10 <sup>-1</sup> | 0.88 [0.76-1.03] | 0.11 | 8/113/449   | 1.40×10 <sup>-1</sup> | 0.85 [0.69-1.05] | 0.12 | 10/217/789  | 1.55×10 <sup>-1</sup> | 0.88 [0.74-1.05] |
| rs2270777  | 56,431,423 | A | 0.41 | 236/686/502 | 0.45 | 354/864/531 | 6.15×10 <sup>-4</sup> | 1.19 [1.08-1.32] | 0.46 | 129/267/175 | 2.31×10 <sup>-3</sup> | 1.24 [1.08-1.42] | 0.44 | 194/513/309 | 1.12×10 <sup>-2</sup> | 1.16 [1.03-1.30] |
| rs1048691  | 56,439,215 | T | 0.23 | 72/496/852  | 0.22 | 86/592/1073 | 4.93×10 <sup>-1</sup> | 0.96 [0.85-1.08] | 0.19 | 24/173/373  | 2.99×10 <sup>-2</sup> | 0.83 [0.70-0.98] | 0.23 | 56/351/612  | 8.70×10 <sup>-1</sup> | 1.01 [0.88-1.16] |
| rs4646537  | 56,443,548 | C | 0.04 | 1/114/1310  | 0.04 | 6/113/1634  | 2.95×10 <sup>-1</sup> | 0.87 [0.67-1.13] | 0.03 | 3/33/536    | 3.30×10 <sup>-1</sup> | 0.83 [0.58-1.21] | 0.04 | 3/69/947    | 4.91×10 <sup>-1</sup> | 0.90 [0.67-1.21] |
| rs8176345  | 56,444,825 | A | 0.04 | 1/98/1324   | 0.03 | 1/113/1634  | 6.24×10 <sup>-1</sup> | 0.93 [0.71-1.23] | 0.03 | 0/39/532    | 8.81×10 <sup>-1</sup> | 0.97 [0.67-1.42] | 0.03 | 0/62/953    | 3.80×10 <sup>-1</sup> | 0.87 [0.63-1.20] |
| rs703842   | 56,449,006 | C | 0.34 | 177/627/621 | 0.31 | 153/769/823 | 2.20×10 <sup>-3</sup> | 0.85 [0.76-0.94] | 0.31 | 51/254/266  | 5.11×10 <sup>-2</sup> | 0.86 [0.75-1.00] | 0.30 | 87/441/484  | 3.27×10 <sup>-3</sup> | 0.83 [0.74-0.94] |
| rs11172335 | 56,461,468 | T | 0.34 | 177/622/625 | 0.31 | 151/770/831 | 1.83×10 <sup>-3</sup> | 0.85 [0.76-0.94] | 0.31 | 51/253/268  | 5.14×10 <sup>-2</sup> | 0.86 [0.75-1.00] | 0.30 | 85/443/490  | 2.34×10 <sup>-3</sup> | 0.83 [0.73-0.93] |
| rs17565804 | 56,462,687 | T | 0.05 | 2/131/1292  | 0.04 | 7/136/1605  | 3.93×10 <sup>-1</sup> | 0.90 [0.71-1.14] | 0.04 | 4/42/524    | 6.37×10 <sup>-1</sup> | 0.92 [0.66-1.29] | 0.04 | 3/78/936    | 3.15×10 <sup>-1</sup> | 0.87 [0.66-1.15] |
| rs10877020 | 56,474,281 | A | 0.42 | 251/696/470 | 0.46 | 369/870/511 | 3.46×10 <sup>-3</sup> | 1.16 [1.05-1.28] | 0.47 | 129/283/160 | 4.18×10 <sup>-3</sup> | 1.22 [1.07-1.40] | 0.46 | 212/502/302 | 2.38×10 <sup>-2</sup> | 1.14 [1.02-1.28] |
| rs2277326  | 56,488,686 | T | 0.37 | 196/670/557 | 0.41 | 295/846/596 | 1.15×10 <sup>-3</sup> | 1.18 [1.07-1.31] | 0.43 | 105/277/189 | 1.97×10 <sup>-3</sup> | 1.25 [1.08-1.43] | 0.41 | 164/491/352 | 1.98×10 <sup>-2</sup> | 1.15 [1.02-1.29] |
| rs12582311 | 56,489,531 | G | 0.23 | 76/512/832  | 0.23 | 93/616/1033 | 7.35×10 <sup>-1</sup> | 0.98 [0.87-1.10] | 0.22 | 27/193/350  | 2.49×10 <sup>-1</sup> | 0.91 [0.77-1.07] | 0.24 | 61/356/594  | 8.23×10 <sup>-1</sup> | 1.02 [0.89-1.16] |
| rs10783853 | 56,520,529 | A | 0.30 | 126/586/701 | 0.27 | 122/688/925 | 1.42×10 <sup>-2</sup> | 0.87 [0.78-0.97] | 0.28 | 39/231/291  | 1.92×10 <sup>-1</sup> | 0.90 [0.77-1.05] | 0.27 | 72/397/545  | 2.43×10 <sup>-2</sup> | 0.86 [0.76-0.98] |
| rs4760340  | 56,561,443 | T | 0.50 | 360/699/364 | 0.47 | 386/869/497 | 1.64×10 <sup>-2</sup> | 0.89 [0.80-0.98] | 0.46 | 122/284/166 | 3.59×10 <sup>-2</sup> | 0.86 [0.75-0.99] | 0.48 | 230/508/280 | 1.16×10 <sup>-1</sup> | 0.91 [0.81-1.02] |
| rs17119981 | 56,573,469 | A | 0.05 | 1/145/1278  | 0.05 | 7/145/1571  | 3.15×10 <sup>-1</sup> | 0.89 [0.71-1.12] | 0.05 | 3/47/511    | 5.73×10 <sup>-1</sup> | 0.91 [0.66-1.26] | 0.04 | 3/84/917    | 2.82×10 <sup>-1</sup> | 0.86 [0.66-1.13] |
| rs12309291 | 56,579,931 | G | 0.05 | 3/150/1270  | 0.06 | 9/199/1535  | 2.11×10 <sup>-1</sup> | 1.15 [0.93-1.42] | 0.05 | 2/54/510    | 6.55×10 <sup>-1</sup> | 0.93 [0.68-1.27] | 0.07 | 6/130/879   | 2.92×10 <sup>-2</sup> | 1.30 [1.03-1.64] |
| rs7977734  | 56,587,329 | C | 0.05 | 5/142/1278  | 0.06 | 8/181/1551  | 5.70×10 <sup>-1</sup> | 1.07 [0.86-1.32] | 0.05 | 2/55/512    | 8.53×10 <sup>-1</sup> | 0.97 [0.71-1.32] | 0.06 | 6/113/892   | 2.05×10 <sup>-1</sup> | 1.17 [0.92-1.49] |
| rs12816216 | 56,633,587 | A | 0.04 | 3/113/1300  | 0.05 | 7/167/1569  | 6.57×10 <sup>-2</sup> | 1.25 [0.99-1.58] | 0.05 | 0/53/516    | 5.21×10 <sup>-1</sup> | 1.11 [0.80-1.55] | 0.05 | 6/98/909    | 4.60×10 <sup>-2</sup> | 1.31 [1.00-1.71] |
| rs4362183  | 56,649,511 | C | 0.30 | 122/619/681 | 0.28 | 150/695/905 | 9.54×10 <sup>-2</sup> | 0.91 [0.82-1.02] | 0.28 | 51/215/303  | 1.23×10 <sup>-1</sup> | 0.89 [0.76-1.03] | 0.28 | 82/413/524  | 1.29×10 <sup>-1</sup> | 0.91 [0.80-1.03] |

**Table E7: Haplotype association analysis around the lead SNP rs1050045.** Haplotypes of the lead SNP rs1050045 and six neighboring SNPs in the *OS9* gene region in the fine-mapping panel D (1,708 sarcoidosis cases, 1,429 controls). Alleles are given for the SNPs in the following order: rs11172300, rs1689585, rs1628552, rs4760168, rs7979246, rs10783844 and rs1050045. **F Co**: haplotype frequency in controls. **P**: P value of a score test assuming an additive effect of the respective haplotype. **SA**: controls vs. all sarcoidosis patients. **Acute SA**: controls vs. patients with the acute subphenotype (n = 570). **Chronic SA**: controls vs. chronic subphenotype (n = 1016). **Global P**: P-value for a difference in the joint frequency distribution of all haplotypes between cases and controls. **Ns**: not significant.

| Haplotype       | F Co  | P SA                   | P acute SA              | P chronic SA           |
|-----------------|-------|------------------------|-------------------------|------------------------|
| C A C T A A C   | 0.001 | ns                     | -                       | ns                     |
| C A T G A A T   | 0.001 | ns                     | -                       | ns                     |
| C A T G G A C   | 0.001 | 2.54x10 <sup>-02</sup> | -                       | ns                     |
| C A T G G C C   | 0.006 | 2.59x10 <sup>-02</sup> | ns                      | 2.30x10 <sup>-02</sup> |
| C A T G G C T   | 0.229 | 3.86x10 <sup>-02</sup> | ns                      | 1.90x10 <sup>-02</sup> |
| C A C G A A T   | 0.004 | ns                     | ns                      | ns                     |
| C A C T A A C   | 0.001 | ns                     | -                       | ns                     |
| C A C T A A T   | 0.325 | ns                     | 4.96 x10 <sup>-03</sup> | ns                     |
| C A C T G A T   | 0.010 | ns                     | ns                      | ns                     |
| C A C T G C T   | 0.001 | ns                     | -                       | ns                     |
| T A T G G C C   | 0.416 | 2.44x10 <sup>-03</sup> | 5.80x10 <sup>-4</sup>   | 1.50x10 <sup>-02</sup> |
| T A T G G C T   | 0.002 | ns                     | ns                      | ns                     |
| <b>global P</b> |       | 9.13x10 <sup>-03</sup> | 4.68x10 <sup>-03</sup>  | ns                     |

**Table E8: Prediction of SNP function**

The potential functional effect of the seven strongly associated SNPs in the *OS9* gene region (highlighted in yellow) and 26 additional SNPs that are in strong LD ( $r^2 > 0.9$ ) with those were investigated using the NIEHS SNPinfo web server [31]. Positions refer to human genome build 18, and p values from the fine-mapping stage are given for patients with sarcoidosis ( $P_{SA}$ ) and the acute ( $P_{acute}$ ) and chronic subphenotype ( $P_{chronic}$ ) compared to controls. Only functional categories with a reliable predictive value are shown in the table:

Effect on transcription by location of the variant in a transcription factor binding site (TFBS), effect on splicing due to location of the SNP in an exonic splicing enhancer or exonic splicing silencer (Splicing), effect miRNA binding according to the miRanda database (miRNA), the regulatory potential according to ESPERR Regulatory Potential (RegPot) and conservation according to the Vertebrate Multiz Alignment and Conservation Score in 17 species (Cons). The two latter parameters (RegPot and Cons) are given only for SNP outside the coding region. For references of the individual prediction tools and a detailed description please see <http://snpinfo.niehs.nih.gov/guide.htm#snpfunc>.

| dbSNP ID   | Position   | P <sub>SA</sub>         | P <sub>acute</sub>      | P <sub>chronic</sub>    | TFBS | Splicing | miRNA | RegPot | Cons | Nearby Gene | Allele |
|------------|------------|-------------------------|-------------------------|-------------------------|------|----------|-------|--------|------|-------------|--------|
| rs7314152  | 56,303,968 | -                       | -                       | -                       | --   | --       | --    | 0.13   | 0.09 | SLC26A10    | T      |
| rs774887   | 56,321,102 | -                       | -                       | -                       | --   | --       | --    |        |      | B4GALNT1    | A      |
| rs1082502  | 56,321,973 | -                       | -                       | -                       | --   | --       | --    |        |      | B4GALNT1    | A      |
| rs1629032  | 56,324,953 | -                       | -                       | -                       | --   | --       | --    |        |      | B4GALNT1    | T      |
| rs1678514  | 56,332,984 | -                       | -                       | -                       | --   | --       | --    |        |      | B4GALNT1    | C      |
| rs1678516  | 56,333,725 | -                       | -                       | -                       | --   | --       | --    |        |      | B4GALNT1    | G      |
| rs1678520  | 56,335,586 | -                       | -                       | -                       | --   | --       | --    |        |      | B4GALNT1    | C      |
| rs1689595  | 56,343,030 | 8.02 x10 <sup>-02</sup> | 4.02 x10 <sup>-03</sup> | 5.29 x10 <sup>-01</sup> | --   | --       | --    |        |      | B4GALNT1    | C      |
| rs1689592  | 56,344,040 | -                       | -                       | -                       | --   | --       | --    |        |      | B4GALNT1    | C      |
| rs10876993 | 56,348,934 | -                       | -                       | -                       | --   | --       | --    |        |      | B4GALNT1    | C      |
| rs1678540  | 56,351,269 | -                       | -                       | -                       | Y    | --       | --    |        |      | B4GALNT1    | A      |
| rs2640629  | 56,351,715 | -                       | -                       | -                       | Y    | --       | --    |        |      | B4GALNT1    | C      |
| rs2640631  | 56,353,799 | -                       | -                       | -                       | Y    | --       | --    |        |      | B4GALNT1    | A      |
| rs774890   | 56,354,655 | -                       | -                       | -                       | Y    | --       | --    |        |      | B4GALNT1    | T      |
| rs1689587  | 56,361,665 | -                       | -                       | -                       | --   | --       | --    |        |      | OS9         | A      |
| rs11172300 | 56,362,782 | 1.54 x10 <sup>-03</sup> | 4.09 x10 <sup>-04</sup> | 3.35 x10 <sup>-02</sup> | --   | --       | --    |        | 0.07 | OS9         | C      |
| rs2640637  | 56,363,853 | -                       | -                       | -                       | --   | --       | --    |        |      | OS9         | A      |
| rs1689585  | 56,366,407 | 4.02 x10 <sup>-02</sup> | 4.98 x10 <sup>-04</sup> | 4.25 x10 <sup>-01</sup> | --   | --       | --    |        | 0.04 | OS9         | T      |
| rs1628552  | 56,368,409 | 5.92 x10 <sup>-02</sup> | 1.10 x10 <sup>-03</sup> | 5.19 x10 <sup>-01</sup> | --   | --       | --    |        |      | OS9         | C      |
| rs10877001 | 56,369,344 | -                       | -                       | -                       | Y    | --       | --    |        |      | OS9         | T      |
| rs1678504  | 56,371,765 | -                       | -                       | -                       | Y    | --       | --    |        |      | OS9         | G      |
| rs7311632  | 56,372,607 | -                       | -                       | -                       | Y    | --       | --    |        | 0.01 | OS9         | A      |
| rs4760168  | 56,374,004 | 8.23 x10 <sup>-02</sup> | 2.52 x10 <sup>-03</sup> | 5.12 x10 <sup>-01</sup> | Y    | --       | --    | 0.35   |      | OS9         | T      |
| rs3825078  | 56,375,680 | -                       | -                       | -                       | --   | --       | --    |        |      | OS9         | A      |
| rs7979246  | 56,378,821 | 1.18 x10 <sup>-01</sup> | 1.80 x10 <sup>-03</sup> | 7.48 x10 <sup>-01</sup> | --   | --       | --    | 0.01   |      | OS9         | A      |
| rs7952989  | 56,382,256 | -                       | -                       | -                       | --   | --       | --    |        |      | OS9         | T      |
| rs10783844 | 56,384,692 | 7.10 x10 <sup>-02</sup> | 1.57 x10 <sup>-03</sup> | 5.23 x10 <sup>-01</sup> | --   | --       | --    |        |      | OS9         | A      |
| rs7295422  | 56,386,003 | -                       | -                       | -                       | --   | --       | --    |        |      | OS9         | G      |
| rs7976852  | 56,386,818 | -                       | -                       | -                       | --   | --       | --    |        |      | OS9         | G      |
| rs10877008 | 56,389,859 | -                       | -                       | -                       | --   | --       | --    |        |      | OS9         | A      |
| rs10082911 | 56,390,371 | -                       | -                       | -                       | --   | --       | --    |        | 0.01 | OS9         | C      |
| rs799265   | 56,398,456 | -                       | -                       | -                       | --   | Y        | --    | 0.59   | 1.00 | OS9         | A      |
| rs1050045  | 56,401,538 | 1.10 x10 <sup>-04</sup> | 2.08 x10 <sup>-04</sup> | 3.20 x10 <sup>-03</sup> | Y    | Y        | Y     | 0.07   | 0.01 | OS9         | T      |

### 3. References

1. Fischer A, Valentonyte R, Nebel A, Nothnagel M, Müller-Quernheim J, Schürmann M, Schreiber S. Female-specific association of C-C chemokine receptor 5 gene polymorphisms with Lofgren's syndrome. *J Mol Med* 2008; 86(5): 553-561.
2. Hofmann S, Franke A, Fischer A, Jacobs G, Nothnagel M, Gaede KI, Schürmann M, Müller-Quernheim J, Krawczak M, Rosenstiel P, Schreiber S. Genome-wide association study identifies ANXA11 as a new susceptibility gene for sarcoidosis. *Nat Genet* 2008; 40: 1103 - 1106.
3. Prasse A, Katic C, Germann M, Buchwald A, Zissel G, Muller-Quernheim J. Phenotyping sarcoidosis from a pulmonary perspective. *Am J Respir Crit Care Med* 2008; 177(3): 330-336.
4. Krawczak M, Nikolaus S, von Eberstein H, Croucher PJP, El Mokhtari NE, Schreiber S. PopGen: Population-Based Recruitment of Patients and Controls for the Analysis of Complex Genotype-Phenotype Relationships. *Community Genet* 2006; 9(1): 55-61.
5. Valentonyte R, Hampe J, Huse K, Rosenstiel P, Albrecht M, Stenzel A, Nagy M, Gaede KI, Franke A, Haesler R, Koch A, Lengauer T, Seegert D, Reiling N, Ehlers S, Schwinger E, Platzer M, Krawczak M, Müller-Quernheim J, Schürmann M, Schreiber S. Sarcoidosis is associated with a truncating splice site mutation in BTNL2. *Nat Genet* 2005; 37(4): 357-364.
6. Statement on Sarcoidosis. Joint Statement of the American Thoracic Society (ATS), the European Respiratory Society (ERS) and the World Association of Sarcoidosis and other granulomatous disorders (WASOG) adopted by the ATS Board of Directors and by the ERS Executive Committee. *Am J Respir Crit Care Med* 1999; 160(2): 736-755.
7. Klareskog L, Stolt P, Lundberg K, Kallberg H, Bengtsson C, Grunewald J, Ronnelid J, Harris HE, Ulfgren AK, Rantapaa-Dahlqvist S, Eklund A, Padyukov L, Alfredsson L. A new model for an etiology of rheumatoid arthritis: smoking may trigger HLA-DR (shared epitope)-restricted immune reactions to autoantigens modified by citrullination. *Arthritis Rheum* 2006; 54(1): 38-46.
8. A second generation human haplotype map of over 3.1 million SNPs. *Nature* 2007; 449(7164): 851-861.
9. R Development Core Team. R: A language and environment for statistical computing. *R Foundation for Statistical Computing, Vienna, Austria* 2010; <http://www.R-project.org>.
10. Purcell S, Neale B, Todd-Brown K, Thomas L, Ferreira MR, Bender D, Maller J, Sklar P, de Bakker PW, Daly M, Sham P. PLINK: A Tool Set for Whole-Genome Association and Population-Based Linkage Analyses. *Am J Hum Genet* 2007; 81(3): 559-575.
11. Wigginton JE, Cutler DJ, Abecasis GR. A note on exact tests of Hardy-Weinberg equilibrium. *Am J Hum Genet* 2005; 76(5): 887-893.
12. Franke A, Balschun T, Sina C, Ellinghaus D, Hasler R, Mayr G, Albrecht M, Wittig M, Buchert E, Nikolaus S, Gieger C, Wichmann HE, Sventoraityte J, Kupcinskis L, Onnie CM, Gazouli M, Anagnou NP, Strachan D, McArdle WL, Mathew CG, Rutgeerts P, Vermeire S, Vatn MH, Krawczak M, Rosenstiel P, Karlsen TH, Schreiber S. Genome-wide association study for ulcerative colitis identifies risk loci at 7q22 and 22q13 (IL17REL). *Nat Genet* 2010; 42(4): 292-294.
13. Repapi E, Sayers I, Wain LV, Burton PR, Johnson T, Obeidat M, Zhao JH, Ramasamy A, Zhai G, Vitart V, Huffman JE, Igl W, Albrecht E, Deloukas P, Henderson J, Granell R, McArdle WL, Rudnicka AR, Barroso I, Loos RJ, Wareham NJ, Mustelin L, Rantanen T, Surakka I, Imboden M, Wichmann HE, Grkovic I, Jankovic S, Zgaga L, Hartikainen AL, Peltonen L, Gyllenstein U, Johansson A, Zaboli G, Campbell H, Wild SH, Wilson JF, Glaser S, Homuth G, Volzke H, Mangino M, Soranzo N, Spector TD, Polasek O, Rudan I, Wright AF, Heliovaara M, Ripatti S, Pouta A, Naluai AT, Olin AC, Toren K, Cooper MN, James AL,

- Palmer LJ, Hingorani AD, Wannamethee SG, Whincup PH, Smith GD, Ebrahim S, McKeever TM, Pavord ID, MacLeod AK, Morris AD, Porteous DJ, Cooper C, Dennison E, Shaheen S, Karrasch S, Schnabel E, Schulz H, Grallert H, Bouatia-Naji N, Delplanque J, Froguel P, Blakey JD, Britton JR, Morris RW, Holloway JW, Lawlor DA, Hui J, Nyberg F, Jarvelin MR, Jackson C, Kahonen M, Kaprio J, Probst-Hensch NM, Koch B, Hayward C, Evans DM, Elliott P, Strachan DP, Hall IP, Tobin MD. Genome-wide association study identifies five loci associated with lung function. *Nat Genet* 2010: 42(1): 36-44.
14. Neale BM, Fagerness J, Reynolds R, Sobrin L, Parker M, Raychaudhuri S, Tan PL, Oh EC, Merriam JE, Souied E, Bernstein PS, Li B, Frederick JM, Zhang K, Brantley MA, Jr., Lee AY, Zack DJ, Campochiaro B, Campochiaro P, Ripke S, Smith RT, Barile GR, Katsanis N, Allikmets R, Daly MJ, Seddon JM. Genome-wide association study of advanced age-related macular degeneration identifies a role of the hepatic lipase gene (LIPC). *Proc Natl Acad Sci U S A* 2010: 107(16):7395-400.
15. Ellinghaus E, Stanulla M, Richter G, Ellinghaus D, Te Kronnie G, Cario G, Cazzaniga G, Horstmann M, Panzer Grumayer R, Cave H, Trka J, Cinek O, Teigler-Schlegel A, Elsharawy A, Hasler R, Nebel A, Meissner B, Bartram T, Lescai F, Franceschi C, Giordan M, Nurnberg P, Heinzow B, Zimmermann M, Schreiber S, Schrappe M, Franke A. Identification of germline susceptibility loci in ETV6-RUNX1-rearranged childhood acute lymphoblastic leukemia. *Leukemia* 2012: 26(5): 902-909.
16. Hampe J, Franke A, Rosenstiel P, Till A, Teuber M, Huse K, Albrecht M, Mayr G, De La Vega FM, Briggs J, Gunther S, Prescott NJ, Onnie CM, Hasler R, Sipos B, Folsch UR, Lengauer T, Platzer M, Mathew CG, Krawczak M, Schreiber S. A genome-wide association scan of nonsynonymous SNPs identifies a susceptibility variant for Crohn disease in ATG16L1. *Nat Genet* 2007: 39(2): 207-211.
17. De la Vega FM, Lazaruk KD, Rhodes MD, Wenz MH. Assessment of two flexible and compatible SNP genotyping platforms: TaqMan SNP Genotyping Assays and the SNPlex Genotyping System. *Mutat Res* 2005: 573(1-2): 111-135.
18. Teuber M, Koch WA, Manaster C, Wächter S, Hampe J, Schreiber S. Improving quality control and workflow management in high-throughput single-nucleotide polymorphism genotyping environments. *JALA* 2005: 10(1): 43-47.
19. Akaike H. Information theory and an extension of the maximum likelihood principle. In: Csaaki BNPaF, ed. International Symposium on Information Theory 2nd ed. Akademiai Kiado, Budapest, 1973; pp. 267-281.
20. Abecasis GR, Cookson WOC. GOLD--Graphical Overview of Linkage Disequilibrium. *Bioinformatics* 2000: 16(2): 182-183.
21. Schaid D, Rowland C, Tines D, Jacobson R, Poland G. Score tests for association between traits and haplotypes when linkage phase is ambiguous. *Am J Hum Genet* 2002: 70(2): 425-434.
22. Dupont WD, Plummer WD. PS power and sample size program available for free on the Internet. *Controlled Clin Trials* 1997: 18(274).
23. Barrett JC, Fry B, Maller J, Daly MJ. Haploview: analysis and visualization of LD and haplotype maps. *Bioinformatics* 2005: 21(2): 263-265.
24. Hunninghake GW, Crystal RG. Pulmonary sarcoidosis: a disorder mediated by excess helper T-lymphocyte activity at sites of disease activity. *N Engl J Med* 1981: 305(8): 429-434.
25. Rozen S, Skaletsky H. Primer3 on the WWW for general users and for biologist programmers. *Bioinformatics Methods and Protocols: Methods in Molecular Biology* 2000: 132:365-386.
26. Hofmann S, Fischer A, Till A, Muller-Quernheim J, Hasler R, Franke A, Gade KI, Schaarschmidt H, Rosenstiel P, Nebel A, Schurmann M, Nothnagel M, Schreiber S. A genome-wide association study reveals evidence of association with sarcoidosis at 6p12.1. *Eur Respir J* 2011: 38(5):1127-35.



27. Franke A, Fischer A, Nothnagel M, Becker C, Grabe N, Till A, Lu T, Muller-Quernheim J, Wittig M, Hermann A, Balschun T, Hofmann S, Niemiec R, Schulz S, Hampe J, Nikolaus S, Nurnberg P, Krawczak M, Schurmann M, Rosenstiel P, Nebel A, Schreiber S. Genome-wide association analysis in sarcoidosis and Crohn's disease unravels a common susceptibility locus on 10p12.2. *Gastroenterology* 2008; 135(4): 1207-1215.
28. Valentonyte R, Hampe J, Huse K, Rosenstiel P, Albrecht M, Stenzel A, Nagy M, Gaede KI, Franke A, Haesler R, Koch A, Lengauer T, Seegert D, Reiling N, Ehlers S, Schwinger E, Platzer M, Krawczak M, Muller-Quernheim J, Schurmann M, Schreiber S. Sarcoidosis is associated with a truncating splice site mutation in BTNL2. *Nat Genet* 2005; 37(4): 357-364.
29. Hofmann S, Fischer A, Till A, Muller-Quernheim J, Hasler R, Franke A, Gade KI, Schaarschmidt H, Rosenstiel P, Nebel A, Schurmann M, Nothnagel M, Schreiber S. A genome-wide association study reveals evidence of association with sarcoidosis at 6p12.1. *Eur Respir J* 2011; 38(5): 1127-1135.
30. Fischer A, Nothnagel M, Franke A, Jacobs G, Saadati HR, Gaede KI, Rosenstiel P, Schurmann M, Muller-Quernheim J, Schreiber S, Hofmann S. Association of inflammatory bowel disease risk loci with sarcoidosis, and its acute and chronic subphenotypes. *Eur Respir J* 2011; 37(3): 610-616.
31. Xu Z, Taylor JA. SNPinfo: integrating GWAS and candidate gene information into functional SNP selection for genetic association studies. *Nucleic Acids Res* 2009; 37(Web Server issue): W600-605.
